# 1 Topological segregation of functional networks 2 increases in developing brains

3 Wei He<sup>1,2\*</sup>, Paul F. Sowman<sup>1,2</sup>, Jon Brock<sup>2</sup>, Andrew C. Etchell<sup>2</sup>, Cornelis J. Stam<sup>3</sup>, Arjan Hillebrand<sup>3</sup>

4 <sup>1</sup>Department of Cognitive Science, Macquarie University, 16 University Avenue, Sydney, Australia; <sup>2</sup>Australian  
5 Research Council Centre of Excellence in Cognition and Its Disorders, 16 University Avenue, Sydney, Australia;  
6 <sup>3</sup>Amsterdam UMC, Vrije Universiteit Amsterdam, Department of Clinical Neurophysiology and MEG Center,  
7 Amsterdam Neuroscience, De Boelelaan 1117, Amsterdam, The Netherlands; \*For Correspondence:  
8 wei.he@mq.edu.au (Wei He)

---

9  
10 **Abstract** A growing literature conceptualises human brain development from a network perspective, but it remains  
11 unknown how functional brain networks are refined during the preschool years. The extant literature diverges in its  
12 characterisation of functional network development, with little agreement between haemodynamic- and  
13 electrophysiology-based measures. In children aged from 4 to 12 years, as well as adults, age appropriate  
14 magnetoencephalography was used to estimate unbiased network topology, using minimum spanning tree (MST) constructed  
15 from phase synchrony between beamformer-reconstructed time-series. During childhood, network topology becomes  
16 increasingly segregated, while cortical regions decrease in centrality. We propose a heuristic MST model, in which a clear  
17 developmental trajectory for the emergence of complex brain networks is delineated. Our results resolve topological  
18 reorganisation of functional networks across temporal and spatial scales in youth and fill a gap in the literature regarding  
19 neurophysiological mechanisms of functional brain maturation during the preschool years.

---

## 21 Introduction

22 Modern network science has revealed that normal brain networks exhibit fundamental properties of three canonical network  
23 extremes - a *random network* (Erdős and Rényi, 1959), a locally connected and highly ordered (*regular*) network (Mulder, 1992),  
24 and a *scale-free network* with a small number of highly connected nodes (so-called "hubs", Barabasi and Albert 1999). Adult  
25 brain networks also display hierarchical modularity (Meunier et al., 2009; Stam, 2014; Wig, 2017), in which modules that include  
26 regions from the default mode, fronto-parietal, parieto-temporal, or subcortical networks support specific cognitive functions  
27 (Bullmore et al., 2009; Fornito et al., 2011; Power et al., 2011). A heuristic model of complex brain networks has been proposed  
28 (Stam and van Straaten, 2012) to characterise the properties of real brain networks in an abstract "network space" defined by  
29 the four network models (i.e., regular, random, scale-free, and hierarchical modular networks). This heuristic model of "network  
30 space" suggests that the hierarchical modular network is an "attractor" for healthy brain networks and the other three extreme  
31 networks are "attractors" for different stages or patterns of brain diseases (Stam and van Straaten, 2012; Stam, 2014).

32 Despite the robust and reproducible description of adult brain networks, there is relatively scant data regarding the  
33 maturation of brain networks. Such data can be acquired non-invasively using magnetic resonance imaging (MRI) or electro-  
34 physiological techniques (such as magnetoencephalography/MEG and electroencephalography/EEG). Studies using MRI-based  
35 measurements have demonstrated that both functional and structural brain networks become more segregated during  
36 childhood (e.g., functional MRI: Fair et al. 2009; Gu et al. 2015; Supekar et al. 2009; structural MRI: Huang et al. 2015; and  
37 diffusion-weighted imaging: Baum et al. 2017). Such development allows for an ongoing balance between the *integration*  
38 of converging information from distributed brain regions, and at the same time the *segregation* of divergent specialised  
39 information streams (Fair et al., 2009; Grayson and Fair, 2017; Richmond et al., 2016; Rubinov and Sporns, 2010). However,  
40 most studies to date have only focused on children older than 6 years or younger than 3 years of age (Grayson and Fair, 2017),  
41 leaving the preschool years of childhood (between 3 and 6 years of age) understudied – a knowledge gap that has been termed  
42 "the missing neurobiology of cognitive development" (Poldrack, 2010).

43 Furthermore, there is little agreement between MRI- and electrophysiology-based network descriptions. Correspondence  
44 between functional MRI and electrophysiological measures of functional brain networks (Brookes et al., 2011) implies that

45 changes in functional MRI network organisation should be, at least partially, preserved in higher temporally-resolved elec-  
46 trophysiological investigations (*Grayson and Fair, 2017*). It follows then, that electrophysiological networks are expected to  
47 become increasingly segregated during childhood development. However, prior EEG studies have reported conflicting results,  
48 which include increasing segregation (*Boersma et al., 2011, 2013; Janssen et al., 2017; Toth et al., 2017*), decreasing segrega-  
49 tion (*Smit et al., 2016; Bathelt et al., 2013; Miskovic et al., 2015*), or no changes with age (*Schafer et al., 2014*). Discrepancy  
50 between developmental MRI- and electrophysiology-based network findings has been difficult to reconcile, partly due to the  
51 different spatial scales that functional networks have been examined at (sensor-level in most EEG versus cortical-level in fMRI  
52 studies). Modern whole-head magnetoencephalography (MEG) allows for sophisticated spatial filtering techniques to accurately  
53 (varying from sub-millimetre to a few centimetres) reconstruct millisecond electrophysiological time series across the cortex  
54 (*Hillebrand et al., 2005; Troebinger et al., 2014; Barratt et al., 2018*), and thus MEG is a critical tool in the quest to resolve these  
55 discrepancies.

56 To better understand how the topology of functional brain networks develops over the whole period of childhood, we used  
57 MEG to collect resting-state electrophysiological signals from children whose ages spanned 4 to 12 years, as well as from adults.  
58 Importantly, we utilised a paediatric MEG system with a child-sized helmet for data collection in children aged under 6 years  
59 (*He et al., 2014; Johnson et al., 2010*). We hypothesised that, based on the heuristic model of complex brain networks, the  
60 healthy brain develops from a more random and integrated structure towards a configuration that offers a balance between  
61 network integration and segregation during normative development (*Stam, 2014*). Specifically, we predicted that: (1) functional  
62 networks become more segregated, shifting from a centralised network topology to a de-centralised configuration (*Boersma et*  
63 *al., 2013; Toth et al., 2017*); (2) individual brain regions become more diverse in their connectedness, i.e., centrality of brain  
64 regions increases for hubs (e.g., regions in the default mode and the fronto-parietal areas), but decreases in non-hub regions  
65 (e.g., regions in the primary visual and auditory areas).

## 66 Results

67 We applied an atlas-based beamforming approach (*Hillebrand et al., 2012*) to reconstruct time series of neuronal activity  
68 recorded using a child-customised 125-channel whole-head gradiometer MEG system optimised for children aged around 5  
69 years (5 year-olds (Y.O.),  $N = 10$ ,  $5.4 \pm 1.1$  years, 5 males). We used a 160-channel whole-head gradiometer MEG system for  
70 children aged around 10 years (10 year-olds (Y.O.),  $N = 14$ ,  $9.8 \pm 1.5$  years, 12 males) and adults ( $N = 24$ ,  $40.6 \pm 17.4$  years,

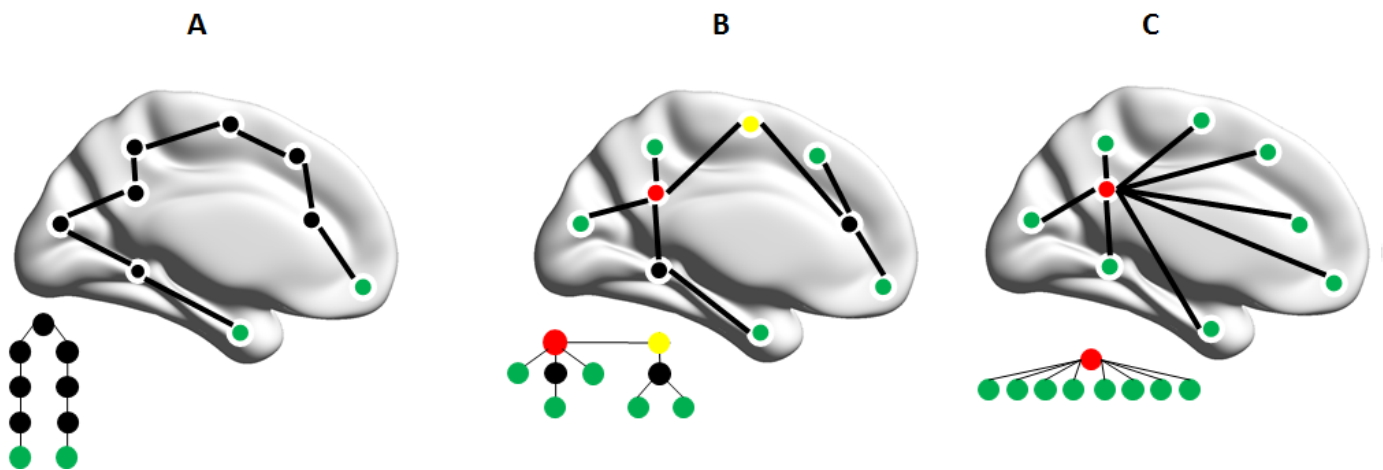

**Figure 1.** Minimum spanning tree (MST) topology and hierarchy of three representative tree models. Top panel: (A) a line-like tree, and (C) a star-like tree. (B) an intermediate configuration between the two extremes. Nodes are indicated by circles, and links by connecting lines. Green nodes are leaves, which have a **Degree** (i.e., number of links to neighbouring nodes) of 1; red nodes are hubs that have the highest **Degree** and **Betweenness Centrality** (i.e., the fraction of the smallest number of links between any two nodes in a network that pass through a node); the yellow node and the red node in B, have the lowest **Eccentricity** (i.e., the largest number of links required for a node reaching any other node in a network). The **Diameter** in B is 5 (i.e., the longest distance between any two nodes in a network). The three lower graphs are the same trees as those overlaid on the template brains above but represented in a way that illustrates that trees with more leaves have fewer layers (nodes with the lowest **Eccentricity** are placed on top). Network A requires many steps for an individual node, especially a leaf node in green, to connect to other nodes (low *integration* and high *segregation*). The steps required for nodes to connect with each other are fewer in C but the central hub/red node is considered 'overloaded' (high *integration* but low *segregation*). The network between these extremes - network B - represents a hierarchical tree, which offers a balance between information *integration* and *segregation*.

71 16 males). Functional connectivity between the 80 regions of interest (ROIs; 78 cortical ROIs and bilateral hippocampi) in  
72 the automated anatomical labelling (AAL; *Tzourio-Mazoyer et al. 2002*) atlas was estimated using the phase lag index (PLI).  
73 Averaged PLI was computed between a region and all 79 other regions, resulting in a single estimation of functional connectivity  
74 per participant. There were no significant PLI differences between the three age groups for any of the 5 frequency bands (delta:  
75 0.5–4 Hz, theta: 4–8 Hz, alpha: 8–13 Hz, beta: 13–30 Hz, and low gamma: 30–48 Hz).

76 Subsequently, we reconstructed the minimum spanning tree (MST; *Figure 1*; *Kruskal 1956*; *Wang et al. 2008*), so that the  
77 topology of functional networks could be characterised and compared without biases that are inherent in conventional graph  
78 theoretical approaches (*Stam, 2014*; *Tewarie et al., 2015*). The MST is a sub-network that contains the strongest connections  
79 within a weighted network without forming cycles or loops; it provides an unbiased reconstruction of the core of a network,  
80 making it possible to create a unique backbone or empirical reference network (e.g., for large datasets such as the human  
81 brain connectome project; *van Dellen et al. 2018*). Moreover, MST parameters are sensitive to alterations in the topology of  
82 brain networks at the functional- (e.g., *Boersma et al. 2013*; *de Bie et al. 2012*; *Janssen et al. 2017*) and structural-level (e.g.,  
83 *Otte et al. 2015*; *van Dellen et al. 2018*), and importantly, can be interpreted along the lines of conventional graph theoretical  
84 measures (*Tewarie et al., 2016*).

### 85 **Topological segregation of the large-scale functional networks**

86 We first sought to understand whether the topology of the functional networks become more segregated during childhood  
87 development. To this end, we calculated 5 global MST measures for each participant: Diameter, Leaf Fraction, Tree Hierarchy,  
88 Degree Correlation, and Kappa. Small Diameter and high Leaf Fraction are characteristic for a highly integrated topology such  
89 as a star-like network (A in *Figure 1*), whereas large Diameter and low Leaf Fraction are representative of a more segregated  
90 topology or line-like network (C in *Figure 1*). An optimal MST topology, requiring a small Diameter without overloading central  
91 nodes, is quantified by Tree Hierarchy (*Boersma et al., 2013*; *Tewarie et al., 2015*). Such a network topology also tends to have  
92 larger Degree Correlation and Kappa, suggesting it is resilient against random damage (*Barrat et al., 2008*; *Van Mieghem et al.,*  
93 *2010*).

94 The 5 global MST measures were significantly different across all 5 frequency bands when comparing children (as a whole  
95 group) to adults: Kappa, Leaf Fraction, and Tree Hierarchy were higher, whereas Degree Correlation and Diameter were lower,  
96 in the children (*Figure 2*). These frequency-independent effects were all highly significant ( $p < 0.001$ ) when contrasting 5 Y.O.  
97 with the other two age groups, but less so when comparing 10 Y.O. with adults. The 10 Y.O. was adult like for most global MST  
98 topological measures, apart from larger Leaf Fraction in the delta ( $p = 0.036$ ) and beta ( $p = 0.041$ ) bands, larger Kappa ( $p =$   
99  $0.017$ ) and Leaf Fraction ( $p = 0.036$ ) in the theta band, and smaller Diameter ( $p = 0.023$ ) but larger Leaf Fraction ( $p = 0.038$ )  
100 and Tree Hierarchy ( $p = 0.007$ ) in the alpha band. Overall, the MST topology becomes more line-like and segregated across all  
101 frequency bands with increasing age (*Figure 3*).

### 102 **Regional de-centralisation correlates with increasing topological segregation**

103 Having established that the network topology is more segregated in adults than in children, we next investigated the centrality  
104 of brain regions. We calculated 3 nodal MST measures for each of the 80 regions in every participant: Degree, Betweenness  
105 Centrality, and Eccentricity. Larger Degree and Betweenness Centrality, but smaller Eccentricity characterise regions (or so-called  
106 “hubs”) that play a central role in the network. We found that, even though there were no significant group differences for the  
107 Degree and Betweenness Centrality, the Eccentricity showed significant increases from children (as a whole group) to adults,  
108 and from 5 Y.O. to adults in particular. The group differences for the Eccentricity, illustrated in *Figure 4*, show pervasive changes  
109 in Eccentricity over the cortex (the full results are shown in Tables 1-5 in *Appendix 1*).

110 When contrasting adults and 5 Y.O.:

- 111 • all 80 ROIs showed larger theta band Eccentricity in adults;
- 112 • in alpha, beta, and delta mediated MSTs, most of the nodes showing larger Eccentricity were in fronto-parietal areas,  
113 followed by the nodes normally assigned to the default mode and parieto-temporal areas, and in hippocampal and  
114 occipital areas;
- 115 • about half of the nodes in the default mode, parieto-temporal, and the occipital areas showed larger Eccentricity in  
116 gamma mediated MSTs.

117 When comparing adults and 10 Y.O.:

- 118 • most of the nodes showing larger Eccentricity were in the default mode, occipital, parieto-temporal, and fronto-parietal  
119 areas in alpha band mediated MSTs;

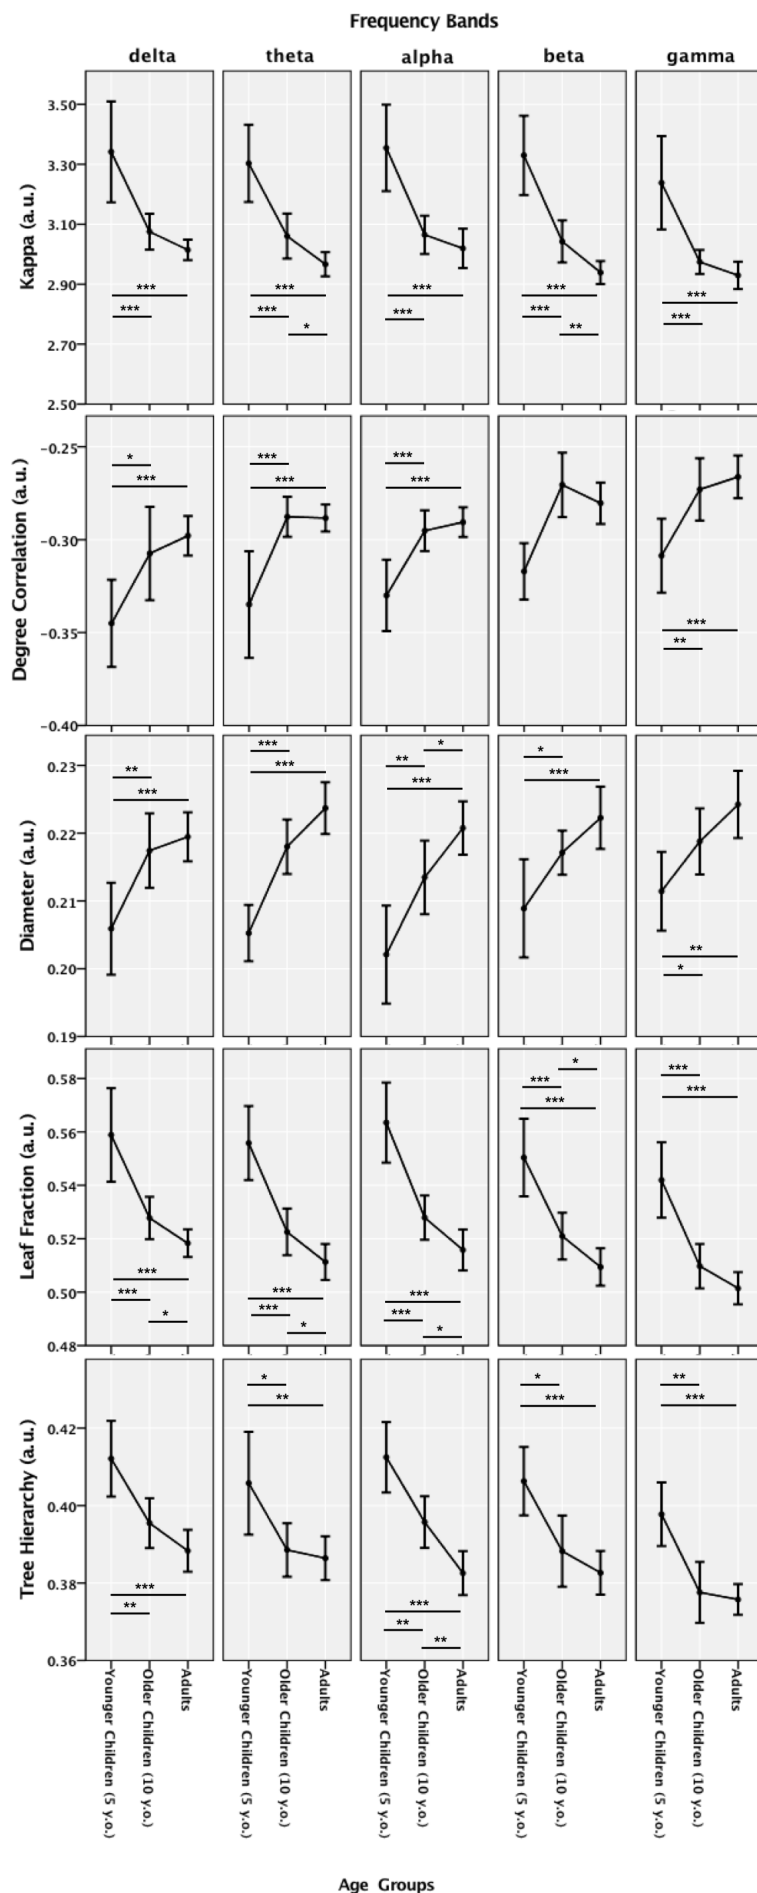

**Figure 2.** Minimum spanning tree (MST) global metrics estimated from individual phase lag index adjacency matrices in the delta (0.5–4 Hz), theta (4–8 Hz), alpha (8–13 Hz), beta (13–30 Hz), and low gamma (30–48 Hz) bands for three age groups (5 year-olds (Y.O.), 10 year-olds (Y.O.), and Adults). Error bars depict 95% confidence intervals estimated using bootstrapping with 1000 random iterations. \* indicates statistically significant group differences ( $p < 0.05$ , 50000 random permutations), \*\* for  $p < 0.01$ , and \*\*\* for  $p < 0.001$ .

- 120 • nodes from the default mode, parieto-temporal and occipital areas showed larger Eccentricity in the theta mediated  
121 MSTs;
- 122 • nodes from the fronto-parietal, parieto-temporal, and hippocampal areas, as well as the nodes from the default mode,  
123 showed larger Eccentricity in the beta mediated MSTs;
- 124 • only nodes from occipital area and the default mode area showed larger Eccentricity in the gamma mediated MSTs;
- 125 • no Eccentricity differences were found in the delta mediated MSTs.

126 When contrasting adults to children (as a whole group), and 5 Y.O. to  
127 the other two age groups, the group differences in Eccentricity exhibited  
128 a similar pattern, namely that a larger Eccentricity was found mostly  
129 in nodes from the fronto-parietal area, followed by those from default  
130 mode, parieto-temporal, occipital and hippocampal areas in delta-to-  
131 gamma mediated MSTs.

## 132 Discussion

133 Capitalising on several novel approaches, we demonstrate in this cross-  
134 sectional MEG study that the topology of functional brain networks  
135 becomes segregated during childhood development. Increasing topo-  
136 logical segregation is associated with increasing regional Eccentricity  
137 across the cortex, indicating that most brain regions become functionally  
138 specialised and less central in the network. Specifically, the reorgani-  
139 sation of network topology has the same profile across all frequency  
140 bands and is not routed via a few hub regions. Importantly, all topolog-  
141 ical network differences are highly significant between the preschool  
142 children/5 Y.O. and older age groups (i.e., older children/10 Y.O. and  
143 adults), suggesting that the preschool years present a unique and im-  
144 portant period of network maturation. These converging results on  
145 topological network changes inform a heuristic MST model from which  
146 normal development during childhood can be characterised.

147 The delineation of large-scale functional brain networks in adults  
148 has confirmed a number of hypotheses regarding the degradation of  
149 network function in aging and disease (*Stam, 2014*). However, the small  
150 number of developmental studies that have examined electrophysiological  
151 networks have produced heterogeneous results. Furthermore, these  
152 results do not align well with MRI-based haemodynamic imaging data.  
153 Critically, we resolved these discrepancies by utilising several technical  
154 and methodological advances: (1) age-appropriate MEG systems that  
155 are insensitive to age-related physiological and anatomical changes in bi-  
156 ological tissues (e.g., bone thickness and density of the skull; *Smith et al.*  
157 *2012*); (2) source-level functional connectivity estimation to facilitate in-  
158 terpretation of our results in an anatomical context, and to effectively  
159 mitigate spurious connectivity/network results inherent in sensor-level  
160 analyses (*Antiqueira et al., 2010; Lai et al., 2017*); (3) leakage insensitive  
161 connectivity estimation using PLI, which effectively ignores spurious  
162 connectivity due to field spread (*Dominguez et al., 2007*) and volume  
163 conduction/signal leakage (*Lai et al., 2017; Schoffelen and Gross, 2009;*  
164 *Stam et al., 2007*); (4) lastly, MST for unbiased network comparisons  
165 between different age groups (*Tewarie et al., 2015; Van Mieghem et al.,*  
166 *2010*).

167 Leveraging data across multiple frequency bands in anatomical  
168 space, we demonstrate that the topology of electrophysiological net-  
169 works becomes increasingly segregated during childhood, in line with  
170 MRI-based findings (*Baum et al., 2017; Fair et al., 2009; Gu et al., 2015;*

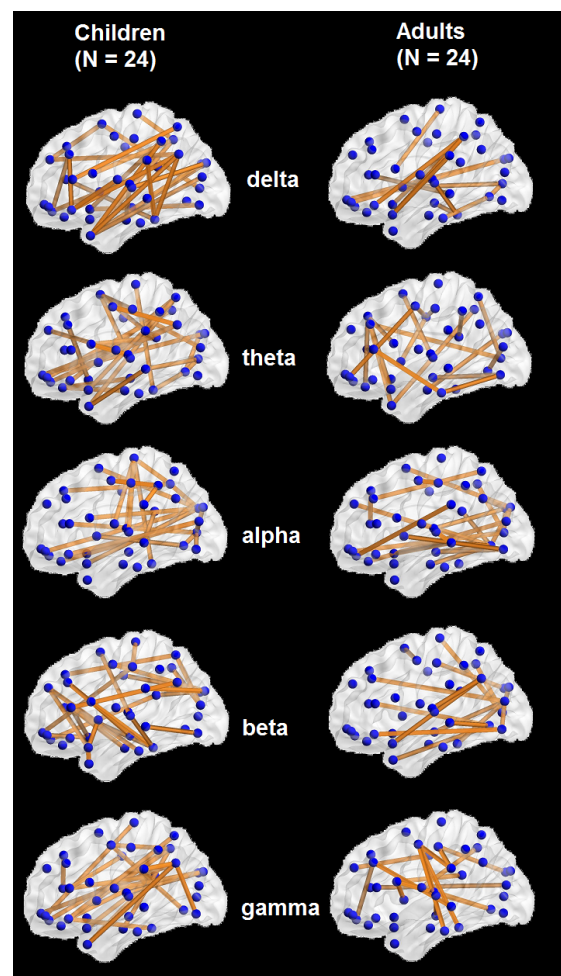

**Figure 3.** Minimum spanning trees (MSTs) for adults (N = 24) and children (N = 24) in five frequency bands (delta: 0.5–4 Hz, theta: 4–8 Hz, alpha: 8–13 Hz, beta: 13–30 Hz, and low gamma: 30–48 Hz), displayed on a template brain with blue dots depicting nodes and yellow lines depicting functional connections. The MSTs depicted are estimated from averaged phase lag index adjacency matrices from adults (right panel) and children (left panel) for illustrative purposes only. The alpha-mediated MST in adults has fewer leaves and a more line-like topology (with central nodes in occipital regions) than the MST in children. This observation agrees with the statistical comparisons between age groups when the MST metrics were based on the un-averaged adjacency matrices in *Figure 2*.

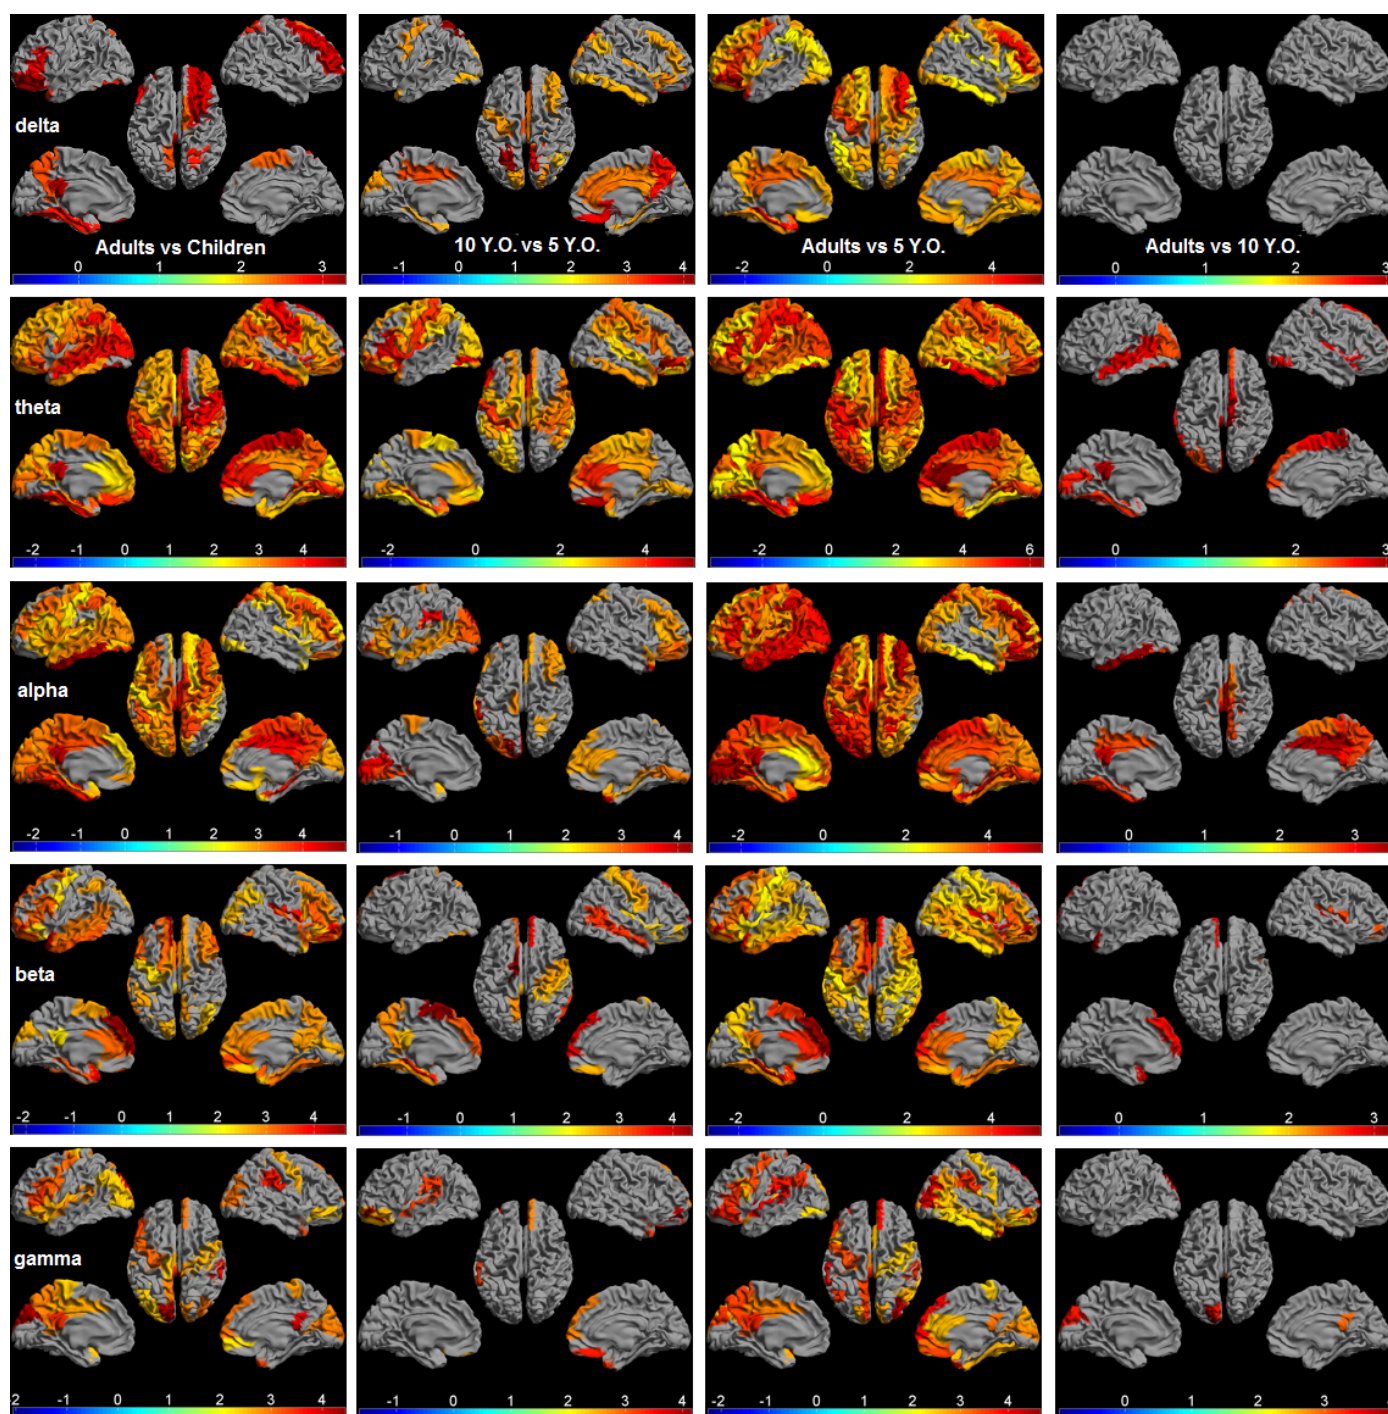

**Figure 4.** Significant differences in the minimum spanning tree (MST) Eccentricity displayed as a color-coded map on the parcellated template brain, viewed from, in clockwise order, the left, top, right, right midline, and left midline. From left to right, pairwise differences (t-value,  $p < 0.05$ , FDR-corrected for 3 nodal MST measures  $\times$  80 ROIs) between adults and children, 10 Y.O. and 5 Y.O., adults and 5 Y.O., as well as adults and 10 Y.O., are shown for all five frequency bands (delta: 0.5–4 Hz, theta: 4–8 Hz, alpha: 8–13 Hz, beta: 13–30 Hz, and low gamma: 30–48 Hz).

171 *Huang et al., 2015*). The smaller Diameter and larger Leaf Fraction in children compared to adults indicates that the topology  
172 of the functional brain networks becomes segregated via a transition from a star-like (centralised) configuration toward a more  
173 line-like (de-centralised) configuration during development. Such network topological change has been found in infants right  
174 after birth (*Toth et al., 2017*) and continues up to 18 years of age (*Boersma et al., 2011*). In addition, the observed larger Kappa  
175 in children compared to adults suggests a movement away from a scale-free network. This finding seems to be at odds with  
176 findings from most adult studies, which indicate that the mature brain network is approximately “scale-free” (*Sporns, 2013*).  
177 However, Kappa is not strictly tied to “scale-freeness”, but rather is a measure for the homogeneity of the degree distribution  
178 in the MST (especially in the case of small networks; *Jinhui et al. 2009*). Moreover, scale-freeness is a relative measure, and  
179 depends on the reference model that the experimental model is compared to (*Stam and van Straaten, 2012*). Thus, the adult  
180 brain may still be scale-free, although less so than brain networks in children. In accordance with the decreased scale-freeness  
181 of adult networks, the increase in Eccentricity found in a distributed set of brain regions across all frequency bands suggests  
182 that during development most brain regions, including hubs become less central, in order to prevent hub overloading, as well as  
183 to reduce vulnerability to targeted attacks (*Stam et al., 2009*). Together, decreasing nodal centrality possibly reflects a protective  
184 mechanism during normative brain development, since disturbances and insults to hub regions can produce lifelong changes in  
185 neurological and mental functioning (*Crossley et al., 2014; DeSalvo et al., 2014; Stam et al., 2009; Tewarie et al., 2014; Yu et al.,*  
186 *2017*). Lastly, the smaller Tree Hierarchy found in adults is less straightforward to understand here, as a decrease in network  
187 hierarchy is often observed in clinical groups (*Stam and van Straaten, 2012*). Tree Hierarchy is a composite MST measure that  
188 takes into account several aspects of the MST, namely the maximum Betweenness Centrality and the number of leafs (*Stam,*  
189 *2014*). Given that Betweenness Centrality and Degree did not differ between children and adults, the observed decrease in Tree  
190 Hierarchy, in our data, is likely to be driven by a decrease in Leaf Fraction. A more straightforward quantification of network  
191 hierarchy, other than Tree Hierarchy, in complex network neuroscience is warranted though. Nevertheless, the present data  
192 point to a balance between network integration and segregation (i.e., a network topology that becomes increasingly segregated)  
193 with locally specialised regions, during childhood development.

194 Most network differences in the current study are frequency-independent, suggesting that similar network constraints  
195 manifest themselves across different physiological architectures (*Barry et al., 2004; Bathelt et al., 2013; Murias et al., 2007*).  
196 All global MST changes in our study share the same profile across the five frequency bands between age groups. Although the  
197 specific distributed regions that showed centrality differences varied across frequency bands, there were also some frequency  
198 invariant differences: the largest number of regions that exhibited between group Eccentricity differences was found in theta  
199 and alpha mediated MSTs; regions in the fronto-parietal and default mode areas displayed the largest differences across all  
200 frequency bands. This seems to contradict some frequency-specific network findings reported in lower frequency bands in  
201 previous developmental EEG studies (*Boersma et al., 2011; Miskovic et al., 2015; Srinivasan, 1999*). These inconsistencies may  
202 be ascribed to differences between cohorts (e.g., age-profiles) and methodological differences (e.g., the use of weighted versus  
203 unweighted graphs, use of different thresholds, and/or the normalisation of networks/graphs via random surrogates; *van Wijk*  
204 *et al. 2010*). Nevertheless, MST analysis used in our study effectively addresses methodological limitations such as biased  
205 estimates of network topology and biased network comparisons (*Tewarie et al., 2015*).

206 Furthermore, there is now a growing understanding that conventional graph theoretical metrics (such as the clustering  
207 coefficient and shortest path length) do not fully account for fundamental properties of brain networks, and the small-world  
208 model is often used inappropriately in the field of neuroscience (*Papo et al., 2016*). Therefore, we propose here a heuristic MST  
209 model space to better capture the trajectory of changes in functional brain networks underlying normative brain development  
210 (*Figure 5*). Within this MST model space, current findings suggest a clear developmental trajectory of brain networks along  
211 the right axis, suggesting a balance between integration and segregation in topology. An adequate delineation of different  
212 trajectories of topological changes in abnormal development, which may be a more useful biomarker than the absolute values  
213 (*Wolff and Piven, 2014*), can also be provided by this network space. For instance, MST networks were found to be more star-like  
214 in ADHD children compared to age-matched typical children (*Janssen et al., 2017*) - a pattern that fits with a shift towards the  
215 lower-right corner of the network space. Such a trend indicates a delay in brain maturation for ADHD children. In contrast,  
216 MST networks become more line-like in children with dyslexia compared to typically developing children (*Fraga Gonzalez et al.,*  
217 *2016*) - a transition to the lower-left corner of the network space. This pattern indicates an alternative developmental trajectory  
218 along the horizontal axis for brain networks in dyslexia, veering from the typical developmental trajectory along the right axis.  
219 Our model space suggests that the normal adult brain that emerges during development is a special composite that combines  
220 optimal network integration and segregation, degree diversity, and hierarchy. Moreover, distinct pathological trajectories in  
221 adults, if projecting the normal adult brain onto the horizontal axis, could also be represented in this model space: a more  
222 de-centralised line-like MST was found in patients with early relapsing remitting multiple sclerosis (*Tewarie et al., 2014*) and  
223 Alzheimer’s disease (*Yu et al., 2016*), suggesting that networks in these diseases move towards the lower-left corner (more

224 segregated); a more centralised star-like MST was observed in fronto-temporal dementia (Yu et al., 2016), indicating an opposite  
225 trend towards the lower-right corner (more integrated).

226

227

228

229

230

231

232

233

234

235

236

237

238

239

240

241

242

243

244

245

246

247

248

249

250

251

252

253

254

255

256

257

258

259

260

261

262

263

264

265

266

267

268

269

270

271

272

273

274

275

276

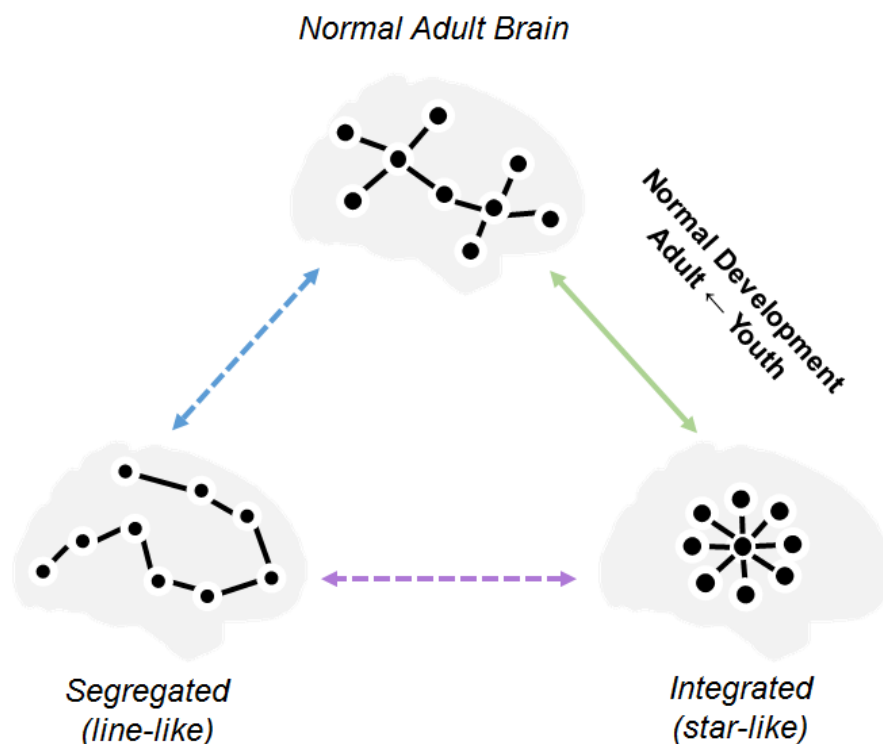

**Figure 5.** A heuristic minimum spanning tree (MST) model for the emergence of complex brain networks. This MST model space is based on the heuristic model of complex brain networks proposed by Stam and Van Straaten 2012. The model space consists of two extreme MSTs (representing network integration/segregation), an optimal MST for the normal adult brain, and three inter-connecting axes. Functional brain networks are proposed to develop from a star-like MST toward the optimal MST along the up-right axis, i.e., a balance between network integration and segregation. The solid line represents a developmental trajectory supported by this study, dashed lines represent trajectories that require future rigorous empirical support.

There are a few caveats worth mentioning in relation to the future application of this work. From a theoretical point of view, it is conceded that there are currently no simple mathematical models that fully characterise healthy brain networks, such as its hierarchical modularity, in order to fill the gap between the existing small-world and scale-free network models. Tree Hierarchy is a composite measure of network hierarchy, and thus is inherently correlated with other measures such as leaf number and maximum betweenness centrality (see methods for details). Therefore, discovery of new mathematical models will likely support a deeper understanding of network constraints on the developing brain (Stam and van Straaten, 2012). From a methodological point of view, although in the present study we took care of signal leakage in source space using the leakage-invariant PLI metric, and loops were discarded in the MST construction, the data may still have suffered to some extent from so-called secondary leakage (Palva and Palva, 2012;

Wang et al., 2018). Therefore, future studies would also benefit from advanced methods such as implementing Lowdin Orthogonalisation (Lowdin, 1950) in MEG connectivity/network analyses to reduce those “ghost” connections (Colclough et al., 2015). Furthermore, for the warping procedure in children, we initially tested with age-specific paediatric templates as it was suspected that, in comparison to the adult template, the paediatric ones would produce a better approximation to the child’s brain anatomy due to better alignment in terms of skull thickness and brain morphology. However, adult and child templates produced very similar results in a previous study (Cheyne et al., 2014). Moreover, the AAL atlas was not available for these paediatric templates, hence using the anatomical labelling from the AAL (adult) atlas (Tzourio-Mazoyer et al., 2002) in paediatric surrogate structural MRI would still only provide an approximate labelling. Therefore, the surrogate procedure (using the adult template), as well as the subsequent analyses, were kept the same for all participants. Nevertheless, the use of age-specific template brain images and atlases together with surface-based registration in further studies would help to minimise registration errors due to the heterogeneity of brain anatomy in young children (Fonov et al., 2011). In addition, canonically-defined frequency bands may overlook some physiological mechanisms underlying the development of oscillatory neural networks. Estimating network properties from age-appropriate frequency bands is critical in future work (Boersma et al., 2013), for example by parameterization of neuronal power spectral densities on the basis of putative oscillatory components (Haller et al., 2018). Lastly, the developmental trajectory found in this cross-sectional study should be replicated in a large longitudinal sample.

In conclusion, a combination of an atlas-based beamformer in age-appropriate MEG data, leakage-insensitive PLI connectivity estimation, and unbiased MST network measures revealed that functional brain networks become more segregated during



277 childhood. Increases in MST Diameter and decreases in Leaf Fraction indicate that functional networks develop into a more  
278 line-like (de-centralised) topology; increases in Degree Correlation and Eccentricity suggest that brain regions stay less central  
279 and become more locally specialised; decreases in Kappa and Tree Hierarchy emphasise that the network segregation during  
280 development balances the benefits of integration between distant brain regions against the risks of overload on central regions.  
281 Importantly, these topological network changes are most evident in the preschool years of childhood (i.e., the younger age  
282 group between 4-6 years in our data) and exhibit the same pattern for all frequency bands (i.e., delta to low gamma). Our  
283 data resolves a long-standing debate in the field with respect to the normative brain development across spatial and temporal  
284 scales of investigation using MRI-based and electrophysiological measures. Finally, we propose a heuristic MST model for the  
285 emergence of complex brain networks, in which different patterns of network abnormality could be discerned depending upon  
286 their trajectories through this “network space”. Therefore, our study also represents the first attempt in providing a unifying  
287 network model for the development of functional brain networks in youth. We anticipate new data from both normative  
288 and abnormal developmental studies to be incorporated into this network space to enable us not only to understand new  
289 mechanisms for early brain development and resolve ambiguities in the field, but most importantly to translate brain network  
290 studies into solutions for clinical diagnosis and treatments.

## 291 **Methods and Materials**

### 292 **Participants**

293 Included participants were control participants who took part in a larger project on stuttering. The dataset consisted of MEG  
294 recordings collected from 28 children and 24 adults during 3-5 minutes of eyes-open resting-state. Due to excessive head  
295 movement, incidental system noise or signs of drowsiness, data from 4 children were excluded. The present analyses were  
296 therefore completed on a total of 48 participants: 24 children aged from 4 to 12 years, and 24 adults ( $\mu = 40.6$ ,  $\sigma = 17.4$ , 16  
297 males). Children were further divided into two groups: a younger group with mean age centred at 5 years (5 Y.O.,  $N = 10$ ,  $\mu =$   
298  $5.4$ ,  $\sigma = 1.1$ , 5 males) and an older group at 10 years (10 Y.O.,  $N = 14$ ,  $\mu = 9.8$ ,  $\sigma = 1.5$ , 12 males).

299 The experimental procedures were approved by the Human Participants Ethics Committee at Macquarie University. Written  
300 consent was obtained from the adult participants and from the parents/guardians of the children prior to the experiment. All  
301 participants were remunerated for their participation.

### 302 **Experimental Procedures**

303 Upon arriving at the laboratory, participants were familiarised with the magnetically shielded room where they would be tested  
304 in a supine position. Prior to MEG measurements, five head position indicators (HPIs) were attached to a tightly fitting elastic  
305 cap. The 3D locations of the HPIs, fiducial landmarks (nasion, and left and right pre-auricular points) and the shape of each  
306 participant’s head were measured with a pen digitiser (Polhemus Fastrak, Colchester, VT, USA).

307 Children in the 5 Y.O. group were tested using the child-customized 125-channel whole-head gradiometer MEG system  
308 (Model PQ1064R-N2m, KIT, Kanazawa, Japan), and all other participants were tested using the 160-channel whole-head  
309 gradiometer MEG system (Model PQ1160RN2, KIT, Kanazawa, Japan). The gradiometers of both systems have a 50 mm baseline  
310 and 15.5 mm diameter coils, and are positioned in a glass fibre reinforced plastic cryostat for measurement of the normal  
311 component of the magnetic field from the human brain (*Kado et al., 1999*). In both systems, neighbouring channels are 38 mm  
312 apart and 20 mm from the outer dewar surface. The 125-channel dewar was designed to fit a maximum head circumference of  
313 53.4 cm, accommodating more than 90% of heads of 5-year olds (*Johnson et al., 2010*). Both systems were situated within the  
314 same magnetically shielded room, and therefore have comparable environmental noise level.

315 During MEG data acquisition, participants were asked to remain relaxed, awake and with their eyes fixed on a white cross at  
316 the centre of a black 36 cm (width) x 24 cm (length) rectangular image with 4 x 4 degrees of visual angle. The visual presentation  
317 was done by video projectors situated outside the magnetically shielded room (child MEG projector: Sharp Notevision Model  
318 PG10S, Osaka, Japan; Adult MEG projector: InFocus Model IN5108, Portland, USA). Drowsiness was monitored online through  
319 a video-camera so that any affected data would be removed from further analysis. For child participants, an experienced  
320 researcher sat with them during the whole session to make sure they were comfortable.

### 321 **MEG Data Pre-processing**

322 MEG data were acquired at a sampling frequency of 1000 Hz and with an online bandpass of 0.03-200 Hz. Head positions were  
323 measured at the beginning and end of the acquisition session; a movement tolerance of 5 mm and 10 mm was used in adults  
324 and children, respectively.

325 The Yokogawa/KIT MEG data were firstly converted to a CTF data format using BrainWave toolbox developed at the Hospital  
326 for Sick Children in Canada (<http://cheynelab.utoronto.ca>, version 3.3beta, see Cheyne et al., 2014 for details). Then, the

327 CTF compatible MEG data were imported into and processed using DataEditor in the CTF MEG5 software (VSM MedTech  
328 Systems Inc., Coquitlam BC, Canada; Version 5.0.2). The continuous raw MEG data were firstly filtered from 0.5 to 100 Hz using  
329 bi-directional IIR Butterworth filters with DC removal and segmented into epochs of 4096 samples (= 4.096 seconds). Epochs  
330 that contained physiological (e.g., muscle noise) or environmental artefacts were rejected by visual inspection. The cleaned  
331 datasets consisted on average of 23.8 ( $\sigma = 3.02$ ) epochs for the children and 40 epochs ( $\sigma = 0.02$ ) for the adults.

### 332 **Head Modelling and Surrogate MRIs**

333 For the head model construction, obtaining individual structural MRI scans of children - especially of those aged below 6  
334 years - was impractical. A “surrogate” MRI approach was therefore used here to warp the adult Montreal Neurological Institute  
335 (MNI) template T1 structural brain image to each participant’s digitized head shape with an iterative closest point algorithm  
336 implemented in BrainWave (see *Cheyne et al. 2014* for details). MEG data was co-registered with the warped “surrogate” MRI  
337 using the digitised fiducial points. The outline of the scalp from this co-registered “surrogate” MRI was extracted using the  
338 MRIVIEWER in the CTF MEG5 software (VSM MedTech Systems Inc., Coquitlam BC, Canada; Version 5.0.2) and then used to  
339 fit a multisphere volume conductor model (*Huang et al., 1999*), which was subsequently used for the beamformer analysis  
340 described below.

### 341 **Beamforming**

342 An atlas-based beamforming approach (*Hillebrand et al., 2012*) was adopted to project sensor level MEG data to source space.  
343 The co-registered surrogate MRIs were normalised to the standard MNI (T1) template, using the SEG toolbox (*Weiskopf et al.,*  
344 *2011*) in SPM8. The automated anatomical labelling (AAL) atlas (*Tzourio-Mazoyer et al., 2002*) was used to label the voxels in a  
345 participant’s normalised co-registered surrogate MRI, following which the centroid for each AAL regions of interest (80 ROIs; 78  
346 cortical and bilateral hippocampal) was inversely transformed to native space (*Hillebrand et al., 2016*).

347 For each centroid, beamformer weights were computed using Synthetic Aperture Magnetometry (SAM, *Robinson 1999*). This  
348 beamformer selectively weights the contribution from each MEG sensor to a voxel’s activity based on the broad-band (0.5-48  
349 Hz) data covariance matrix, which was computed from (1) all selected time-series, (2) the forward solution (lead field) for a  
350 dipolar source with optimum orientation at that location, and (3) a unity noise covariance that was scaled by the smallest  
351 singular value in a decomposition of the data covariance matrix. The broad-band MEG data were subsequently projected  
352 through the normalised beamformer weights (*Cheyne et al. (2007)*).

353 From the resulting time-series, the first 15 artifact-free epochs, containing 4096 samples (= 4.096 seconds), were selected for  
354 further analyses of functional connectivity and network topology. These selected epochs were then band-pass filtered, using an  
355 offline discrete Fast Fourier Transform filter without phase distortion, as implemented in the BrainWave toolbox developed at  
356 VU University Medical Centre (C.J. Stam; <http://home.kpn.nl/stam7883/brainwave.html>, version 0.9.152.4.1), into five canonical  
357 MEG frequency bands (delta: 0.5–4 Hz, theta: 4–8 Hz, alpha: 8–13 Hz, beta: 13–30 Hz, and low gamma: 30–48 Hz). Subsequently,  
358 the instantaneous phase for each time-series was determined by taking the argument of the analytic signal as computed using  
359 the Hilbert transform (Marple, 1999).

### 360 **Connectivity Analysis**

361 Pair-wise frequency band-specific functional connectivity between the 80 ROIs was estimated using the phase lag index (PLI)  
362 for each of the 15 artifact-free epochs (= 4.096 seconds). PLI reflects the consistency by which one signal is phase leading or  
363 lagging with respect to another signal (*Stam et al., 2007*), which can be expressed as:

$$364 \quad PLI = \langle |\text{sign}[\sin \Delta\varphi(t_k)]| \rangle \quad (1)$$

365 where  $\Delta\varphi$  refers to the instantaneous phase difference between two time-series,  $t_k$  are discrete time steps calculated over  
366 all  $K = 1 \dots N$ ,  $\text{sign}$  refers to the signum function,  $\langle \rangle$  and  $||$  denote the mean and absolute value, respectively. Specifically,  
367 PLI quantifies phase synchronisation as a measure of the asymmetry in the distribution of instantaneous phase differences  
368 between two time-series (in our case the beamformer reconstructed time-series for two ROIs). The value of PLI ranges from  
369 zero (random phase differences/no functional connectivity or only zero-lag/mod  $\pi$ ) and one (perfect non-zero-lag synchrony).  
370 Because the effects of volume conduction/field spread/signal leakage give zero-lag (mod  $\pi$ ) phase differences, PLI is insensitive  
371 to these effects at the cost of being blind to true zero-lag interactions. For each frequency band and each epoch, the 80 x 80  
372 connectivity matrix of pairwise PLI values was computed. ROI-PLI was computed as the average PLI between a node and all  
other nodes, and whole-brain PLI was calculated as the average across all nodal PLI values.

## 373 Minimum Spanning Tree Analysis

374 For each epoch and participant separately, the minimum spanning tree (MST) sub-graph was constructed using the PLI  
375 connectivity matrix. The MST is constructed by connecting all  $n$  nodes in such a way that the cost (the sum of all link weights) is  
376 minimised without forming cycles. For the computation of the MST,  $1/PLI$  is used as the link weights since we are interested in  
377 the strongest connections in the network. MSTs were constructed in BrainWave by applying Kruskal's algorithm (*Kruskal, 1956*),  
378 which starts with an unconnected network, adds the link with lowest weight, then adds the link with next lowest weight (if this  
379 does not create a loop), until all nodes are connected, thereby forming a tree consisting of  $m = n - 1$  links.

380 Two extreme tree topologies exist: (1) a line-like tree (A in *Figure 1*) where all nodes are connected to two other nodes  
381 with the exception of the two so-called "leaf-nodes" at either end that have only one link, and (2) a star-like tree (C in *Figure 1*)  
382 where all leaves are connected to one central node. There are many different tree types between these two extremes (e.g., B in  
383 *Figure 1*). The tree topology can be characterised with various measures (*Boersma et al., 2013*).

384 Global MST network measures are informative about the functional integration and segregation of the entire network. Five  
385 different global MST measures were used here: (1) the "Leaf Fraction" is computed as the number of leaf nodes, divided by  
386 the total number of nodes; (2) the "Diameter" is the longest shortest path between any two nodes, where the shortest path is  
387 defined as the path with smallest number of links between two nodes; (3) the "Tree Hierarchy" was introduced (*Boersma et al.,*  
388 *2013*) to describe a balance between a small diameter without overloading central nodes in the tree (*Figure 1*). It is defined as  
389  $T_H = \frac{l}{2mBC_{max}}$ , where  $l$  is the leaf number and  $BC_{max}$  represents the maximal betweenness centrality in the tree. In a line-like  
390 tree,  $l = 2$  and with  $m$  approaching infinity,  $T_H$  approaches 0; and in a star-like tree,  $l \approx m$ , so  $T_H$  approaches 0.5; for  $l$  between  
391 these two extremes,  $T_H$  can have higher values (with an upper bound of 1); (4) the "Degree Correlation" is an index of whether  
392 the degree of a node is correlated with the degree of its neighbouring nodes (*Van Mieghem et al., 2010*); (5) "Kappa" (also  
393 called degree divergence; *Barrat et al. 2008*) measures the broadness of the degree distribution, and is high in graphs with a  
394 scale-free degree distribution, and low in graphs with a degree distribution that approaches the normal distribution. Kappa  
395 also relates to network robustness: high kappa reflects high resilience against random damage in networks.

396 Nodal MST network measures capture the importance of a node within the network. Three different nodal measures for  
397 centrality ("hubness") were used: (1) the "Degree" is the number of connections of a node to its neighbouring nodes; (2) the  
398 "Betweenness Centrality" is the fraction of the shortest paths that pass through a node; (3) the "Eccentricity" of a node is the  
399 longest shortest path between a node and any other node, and is low if the node is central in the graph (*Bullmore and Sporns,*  
400 *2012*).

## 401 Statistical Analysis

402 Statistical analyses were performed using permutation testing as implemented in the Resampling Statistical Toolkit for Matlab  
403 2016a. We used 50,000 permutations of group membership to empirically approximate the distribution for the null hypothesis  
404 (i.e., no difference between groups) for each contrast. For each permutation, the F/t values were derived for a contrast of  
405 interest, and any F/t values for the original data that exceeded the significance threshold for the F/t distribution were deemed  
406 reliable. Furthermore,  $p$  values were corrected for multiple comparisons at the threshold of 0.05 using the false discovery rate  
407 (FDR, *Benjamini and Hochberg 1995*).

408 For each frequency band and each participant separately, whole-brain PLI were averaged over the 15 epochs per participant.  
409 The ROI-PLI values, global and nodal MST measures were averaged over 15 epochs, yielding 80 ROI-PLI, 5 global MST, and 3 x  
410 80 (= nodal MST measures x ROIs) values per participant for each frequency band, respectively.

411 Permutation tests were initially performed, for each frequency band separately, between adults and children (as a whole  
412 group), for the whole-brain PLI and the global MST measures (FDR corrected for the number of global measures (5)); if the  
413 whole-brain PLI or the global MST measures were significantly different in a specific frequency band, then the ROI-PLI and the  
414 nodal MST measures were compared (FDR corrected for three nodal measures x 80 ROIs). Second level permutation tests were  
415 performed in pairwise groups (10 Y.O. versus 5 Y.O., adults versus 5 Y.O., adults versus 10 Y.O.) for the whole-brain PLI or the  
416 global MST measures if adults and children (as a whole group) showed significant differences for these measures in any specific  
417 frequency band, and for the ROI-PLI or the nodal MST measures if these measures were significantly different in any specific  
418 frequency band between adults and children (as a whole group).

## 419 Acknowledgments

420 We thank all participants for their participation. We also thank Douglas Cheyne and Cecilia Jobst for their assistance in the  
421 preliminary data analysis. Finally, we acknowledge the collaboration of Kanazawa Institute of Technology in establishing the  
422 KIT-Macquarie MEG laboratory.

## Additional information

### Funding

This work was supported by the Australian Research Council (ARC) Centre of Excellence for Cognition and its Disorders (grant number CE110001021, <http://www.ccd.edu.au>), and the ARC Discovery Project (DP170103148). Wei He was supported by the Macquarie University Research Fellowship (MQRF) (IRIS Project: 9201501199). Paul F. Sowman was supported by the National Health and Medical Research Council, Australia (#1003760) and the Australian Research Council (DE130100868).

### Author contributions

Wei He: conceptualisation, funding acquisition, data curation, formal analysis, validation, visualisation, methodology, writing (original draft, reviewing and editing); Paul F Sowman: conceptualisation, funding acquisition, data collection, writing (reviewing and editing); Jon Brock: conceptualisation, funding acquisition, writing (reviewing and editing); Andrew C. Etchell: project management, data collection and curation; Cornelis J. Stam: conceptualisation, resources, methodology, writing (reviewing and editing); Arjan Hillebrand: conceptualisation, resources, formal analysis, validation, visualisation, methodology, supervision, writing (original draft, reviewing and editing).

## References

- Antiqueira L**, Rodrigues FA, van Wijk BC, Costa Lda F, Daffertshofer A. Estimating complex cortical networks via surface recordings- a critical note. *Neuroimage*. 2010; 53(2):439–49. doi: [10.1016/j.neuroimage.2010.06.018](https://doi.org/10.1016/j.neuroimage.2010.06.018).
- Barabasi AL**, Albert R. Emergence of scaling in random networks. *Science*. 1999; 286(5439):509–12.
- Barrat A**, Barthélemy M, Vespignani A. *Dynamical Processes on Complex Networks*. Cambridge: Cambridge University Press; 2008. doi: DOI: [10.1017/CBO9780511791383](https://doi.org/10.1017/CBO9780511791383).
- Barratt EL**, Francis ST, Morris PG, Brookes MJ. Mapping the topological organisation of beta oscillations in motor cortex using MEG. *Neuroimage*. 2018; doi: [10.1016/j.neuroimage.2018.06.041](https://doi.org/10.1016/j.neuroimage.2018.06.041).
- Barry RJ**, Clarke AR, McCarthy R, Selikowitz M, Johnstone SJ, Rushby JA. Age and gender effects in EEG coherence: I. Developmental trends in normal children. *Clin Neurophysiol*. 2004; 115(10):2252–8. doi: [10.1016/j.clinph.2004.05.004](https://doi.org/10.1016/j.clinph.2004.05.004).
- Bathelt J**, O'Reilly H, Clayden JD, Cross JH, de Haan M. Functional brain network organisation of children between 2 and 5 years derived from reconstructed activity of cortical sources of high-density EEG recordings. *Neuroimage*. 2013; 82:595–604. doi: [10.1016/j.neuroimage.2013.06.003](https://doi.org/10.1016/j.neuroimage.2013.06.003).
- Baum GL**, Ciric R, Roalf DR, Betzel RF, Moore TM, Shinohara RT, Kahn AE, Vandekar SN, Rupert PE, Quarmley M, Cook PA, Elliott MA, Ruparel K, Gur RE, Gur RC, Bassett DS, Satterthwaite TD. Modular Segregation of Structural Brain Networks Supports the Development of Executive Function in Youth. *Curr Biol*. 2017; 27(11):1561–1572 e8. doi: [10.1016/j.cub.2017.04.051](https://doi.org/10.1016/j.cub.2017.04.051).
- Benjamini Y**, Hochberg Y. Controlling the false discovery rate: a practical and powerful approach to multiple testing. *Journal of the royal statistical society*. 1995; Series B (Methodological):289–300.
- de Bie HM**, Boersma M, Adriaanse S, Veltman DJ, Wink AM, Roosendaal SD, Barkhof F, Stam CJ, Oostrom KJ, Delemarre-van de Waal HA, Sanz-Arigitia EJ. Resting-state networks in awake five- to eight-year old children. *Hum Brain Mapp*. 2012; 33(5):1189–201. doi: [10.1002/hbm.21280](https://doi.org/10.1002/hbm.21280).
- Boersma M**, Smit DJ, de Bie HM, Van Baal GC, Boomsma DI, de Geus EJ, Delemarre-van de Waal HA, Stam CJ. Network analysis of resting state EEG in the developing young brain: structure comes with maturation. *Hum Brain Mapp*. 2011; 32(3):413–25. doi: [10.1002/hbm.21030](https://doi.org/10.1002/hbm.21030).
- Boersma M**, Smit DJ, Boomsma DI, De Geus EJ, Delemarre-van de Waal HA, Stam CJ. Growing trees in child brains: graph theoretical analysis of electroencephalography-derived minimum spanning tree in 5- and 7-year-old children reflects brain maturation. *Brain Connect*. 2013; 3(1):50–60. doi: [10.1089/brain.2012.0106](https://doi.org/10.1089/brain.2012.0106).
- Brookes MJ**, Woolrich M, Luckhoo H, Price D, Hale JR, Stephenson MC, Barnes GR, Smith SM, Morris PG. Investigating the electrophysiological basis of resting state networks using magnetoencephalography. *Proc Natl Acad Sci U S A*. 2011; 108(40):16783–8. doi: [10.1073/pnas.1112685108](https://doi.org/10.1073/pnas.1112685108).
- Bullmore E**, Barnes A, Bassett DS, Fornito A, Kitzbichler M, Meunier D, Suckling J. Generic aspects of complexity in brain imaging data and other biological systems. *Neuroimage*. 2009; 47(3):1125–34. doi: [10.1016/j.neuroimage.2009.05.032](https://doi.org/10.1016/j.neuroimage.2009.05.032).
- Bullmore E**, Sporns O. The economy of brain network organization. *Nat Rev Neurosci*. 2012; 13(5):336–49. doi: [10.1038/nrn3214](https://doi.org/10.1038/nrn3214).
- Cheyne D**, Bostan AC, Gaetz W, Pang EW. Event-related beamforming: a robust method for presurgical functional mapping using MEG. *Clin Neurophysiol*. 2007; 118(8):1691–704. doi: [10.1016/j.clinph.2007.05.064](https://doi.org/10.1016/j.clinph.2007.05.064).
- Cheyne D**, Jobst C, Tesan G, Crain S, Johnson B. Movement-related neuromagnetic fields in preschool age children. *Hum Brain Mapp*. 2014; 35(9):4858–75. doi: [10.1002/hbm.22518](https://doi.org/10.1002/hbm.22518).
- Colclough GL**, Brookes MJ, Smith SM, Woolrich MW. A symmetric multivariate leakage correction for MEG connectomes. *Neuroimage*. 2015; 117:439–48. doi: [10.1016/j.neuroimage.2015.03.071](https://doi.org/10.1016/j.neuroimage.2015.03.071).

- 472 **Crossley NA**, Mechelli A, Scott J, Carletti F, Fox PT, McGuire P, Bullmore ET. The hubs of the human connectome are generally implicated in the  
473 anatomy of brain disorders. *Brain*. 2014; 137(Pt 8):2382–95. doi: 10.1093/brain/awu132.
- 474 **van Dellen E**, Sommer IE, Bohlken MM, Tewarie P, Draaisma L, Zalesky A, Di Biase M, Brown JA, Douw L, Otte WM, Mandl RCW, Stam CJ.  
475 Minimum spanning tree analysis of the human connectome. *Hum Brain Mapp*. 2018; doi: 10.1002/hbm.24014.
- 476 **DeSalvo MN**, Douw L, Tanaka N, Reinsberger C, Stufflebeam SM. Altered structural connectome in temporal lobe epilepsy. *Radiology*. 2014;  
477 270(3):842–8. doi: 10.1148/radiol.13131044.
- 478 **Dominguez LG**, Wennberg R, Velazquez JLP, Erra RG. Enhanced measured synchronization of unsynchronized sources: inspecting the  
479 physiological significance of synchronization analysis of whole brain electrophysiological recordings. *International Journal of Physical*  
480 *Sciences*. 2007; 2(11):305–317.
- 481 **Erdős P**, Rényi A. On random graphs. *Publicationes Mathematicae (Debrecen)*. 1959; 6:290–297.
- 482 **Fair DA**, Cohen AL, Power JD, Dosenbach NU, Church JA, Miezin FM, Schlaggar BL, Petersen SE. Functional brain networks develop from a "local  
483 to distributed" organization. *PLoS Comput Biol*. 2009; 5(5):e1000381. doi: 10.1371/journal.pcbi.1000381.
- 484 **Fonov V**, Evans AC, Botteron K, Almli CR, McKinstry RC, Collins DL, Brain Development Cooperative G. Unbiased average age-appropriate  
485 atlases for pediatric studies. *Neuroimage*. 2011; 54(1):313–27. doi: 10.1016/j.neuroimage.2010.07.033.
- 486 **Fornito A**, Zalesky A, Bassett DS, Meunier D, Ellison-Wright I, Yucel M, Wood SJ, Shaw K, O'Connor J, Nertney D, Mowry BJ, Pantelis C,  
487 Bullmore ET. Genetic influences on cost-efficient organization of human cortical functional networks. *J Neurosci*. 2011; 31(9):3261–70. doi:  
488 10.1523/JNEUROSCI.4858-10.2011.
- 489 **Fraga Gonzalez G**, Van der Molen MJW, Zaric G, Bonte M, Tijms J, Blomert L, Stam CJ, Van der Molen MW. Graph analysis of EEG resting state  
490 functional networks in dyslexic readers. *Clin Neurophysiol*. 2016; 127(9):3165–3175. doi: 10.1016/j.clinph.2016.06.023.
- 491 **Grayson DS**, Fair DA. Development of large-scale functional networks from birth to adulthood: A guide to the neuroimaging literature.  
492 *Neuroimage*. 2017; doi: 10.1016/j.neuroimage.2017.01.079.
- 493 **Gu S**, Satterthwaite TD, Medaglia JD, Yang M, Gur RE, Gur RC, Bassett DS. Emergence of system roles in normative neurodevelopment. *Proc*  
494 *Natl Acad Sci U S A*. 2015; 112(44):13681–6. doi: 10.1073/pnas.1502829112.
- 495 **Haller M**, Donoghue T, Peterson E, Varma P, Sebastian P, Gao R, Noto T, Knight RT, Shestyuk A, Voytek B. Parameterizing neural power spectra.  
496 *bioRxiv*. 2018; p. 299859.
- 497 **He W**, Brock J, Johnson BW. Face-sensitive brain responses measured from a four-year-old child with a custom-sized child MEG system. *Journal*  
498 *of Neuroscience Methods*. 2014; 222(0):213–217. doi: <http://dx.doi.org/10.1016/j.jneumeth.2013.11.020>.
- 499 **Hillebrand A**, Barnes GR, Bosboom JL, Berendse HW, Stam CJ. Frequency-dependent functional connectivity within resting-state networks: an  
500 atlas-based MEG beamformer solution. *Neuroimage*. 2012; 59(4):3909–21. doi: 10.1016/j.neuroimage.2011.11.005.
- 501 **Hillebrand A**, Singh KD, Holliday IE, Furlong PL, Barnes GR. A new approach to neuroimaging with magnetoencephalography. *Hum Brain*  
502 *Mapp*. 2005; 25(2):199–211. doi: 10.1002/hbm.20102.
- 503 **Hillebrand A**, Tewarie P, van Dellen E, Yu M, Carbo EW, Douw L, Gouw AA, van Straaten EC, Stam CJ. Direction of information flow in large-scale  
504 resting-state networks is frequency-dependent. *Proc Natl Acad Sci U S A*. 2016; 113(14):3867–72. doi: 10.1073/pnas.1515657113.
- 505 **Huang H**, Shu N, Mishra V, Jeon T, Chalak L, Wang ZJ, Rollins N, Gong G, Cheng H, Peng Y, Dong Q, He Y. Development of human brain structural  
506 networks through infancy and childhood. *Cereb Cortex*. 2015; 25(5):1389–404. doi: 10.1093/cercor/bht335.
- 507 **Huang MX**, Mosher JC, Leahy RM. A sensor-weighted overlapping-sphere head model and exhaustive head model comparison for MEG. *Phys*  
508 *Med Biol*. 1999; 44(2):423–40.
- 509 **Janssen TWP**, Hillebrand A, Gouw A, Gelade K, Van Mourik R, Maras A, Oosterlaan J. Neural network topology in ADHD; evidence for maturational  
510 delay and default-mode network alterations. *Clin Neurophysiol*. 2017; 128(11):2258–2267. doi: 10.1016/j.clinph.2017.09.004.
- 511 **Jinhui W**, Liang W, Yufeng Z, Hong Y, Hehan T, Qiyong G, Zhang C, Chaozhe Z, Yong H. Parcellation-dependent small-world brain functional  
512 networks: A resting-state fMRI study. *Human Brain Mapping*. 2009; 30(5):1511–1523. doi: doi:10.1002/hbm.20623.
- 513 **Johnson BW**, Crain S, Thornton R, Tesan G, Reid M. Measurement of brain function in pre-school children using a custom sized whole-head  
514 MEG sensor array. *Clinical neurophysiology : official journal of the International Federation of Clinical Neurophysiology*. 2010; 121(3):340–9.  
515 doi: 10.1016/j.clinph.2009.10.017.
- 516 **Kado H**, Higuchi M, Shimogawara M, Haruta Y, Adachi Y, Kawai J, Ogata H, Uehara G. Magnetoencephalogram systems developed at KIT. *Ieee*  
517 *Transactions on Applied Superconductivity*. 1999; 9(2):4057–4062. doi: Doi 10.1109/77.783918.
- 518 **Kruskal J**. On the shortest spanning subtree of a graph and the traveling salesman problem. *Proceedings of the American Mathematical*  
519 *society*. 1956; 7(1):48–50.

- 520 **Lai M**, Demuru M, Hillebrand A, Fraschini M. A Comparison Between Scalp-And Source-Reconstructed EEG Networks. *bioRxiv*. 2017; p. 121764.
- 521 **Lowdin PO**. On the Non-Orthogonality Problem Connected with the Use of Atomic Wave Functions in the Theory of Molecules and Crystals.  
522 *Journal of Chemical Physics*. 1950; 18:365–375.
- 523 **Meunier D**, Achard S, Morcom A, Bullmore E. Age-related changes in modular organization of human brain functional networks. *Neuroimage*.  
524 2009; 44(3):715–23. doi: [10.1016/j.neuroimage.2008.09.062](https://doi.org/10.1016/j.neuroimage.2008.09.062).
- 525 **Miskovic V**, Ma X, Chou CA, Fan M, Owens M, Sayama H, Gibb BE. Developmental changes in spontaneous electrocortical activity and network  
526 organization from early to late childhood. *Neuroimage*. 2015; 118:237–47. doi: [10.1016/j.neuroimage.2015.06.013](https://doi.org/10.1016/j.neuroimage.2015.06.013).
- 527 **Mulder HM**. Julius Petersen's theory of regular graphs. *Discrete Mathematics*. 1992; 100(1):157–175. doi: [https://doi.org/10.1016/0012-365X\(92\)90639-W](https://doi.org/10.1016/0012-365X(92)90639-W).
- 529 **Murias M**, Swanson JM, Srinivasan R. Functional connectivity of frontal cortex in healthy and ADHD children reflected in EEG coherence. *Cereb*  
530 *Cortex*. 2007; 17(8):1788–99. doi: [10.1093/cercor/bh1089](https://doi.org/10.1093/cercor/bh1089).
- 531 **Otte WM**, van Diessen E, Paul S, Ramaswamy R, Subramanyam Rallabandi VP, Stam CJ, Roy PK. Aging alterations in whole-brain networks during  
532 adulthood mapped with the minimum spanning tree indices: the interplay of density, connectivity cost and life-time trajectory. *Neuroimage*.  
533 2015; 109:171–89. doi: [10.1016/j.neuroimage.2015.01.011](https://doi.org/10.1016/j.neuroimage.2015.01.011).
- 534 **Palva S**, Palva JM. Discovering oscillatory interaction networks with M/EEG: challenges and breakthroughs. *Trends Cogn Sci*. 2012; 16(4):219–30.  
535 doi: [10.1016/j.tics.2012.02.004](https://doi.org/10.1016/j.tics.2012.02.004).
- 536 **Papo D**, Zanin M, Martinez JH, Buldu JM. Beware of the Small-World Neuroscientist! *Front Hum Neurosci*. 2016; 10:96. doi: [10.3389/fnhum.2016.00096](https://doi.org/10.3389/fnhum.2016.00096).
- 538 **Poldrack RA**. Interpreting developmental changes in neuroimaging signals. *Hum Brain Mapp*. 2010; 31(6):872–8. doi: [10.1002/hbm.21039](https://doi.org/10.1002/hbm.21039).
- 539 **Power JD**, Cohen AL, Nelson SM, Wig GS, Barnes KA, Church JA, Vogel AC, Laumann TO, Miezin FM, Schlaggar BL, Petersen SE. Functional  
540 network organization of the human brain. *Neuron*. 2011; 72(4):665–78. doi: [10.1016/j.neuron.2011.09.006](https://doi.org/10.1016/j.neuron.2011.09.006).
- 541 **Richmond S**, Johnson KA, Seal ML, Allen NB, Whittle S. Development of brain networks and relevance of environmental and genetic factors: A  
542 systematic review. *Neurosci Biobehav Rev*. 2016; 71:215–239. doi: [10.1016/j.neubiorev.2016.08.024](https://doi.org/10.1016/j.neubiorev.2016.08.024).
- 543 **Robinson SE**. Functional neuroimaging by synthetic aperture magnetometry (SAM). *Recent advances in biomagnetism*. 1999; p. 302–305.
- 544 **Rubinov M**, Sporns O. Complex network measures of brain connectivity: uses and interpretations. *Neuroimage*. 2010; 52(3):1059–69. doi:  
545 [10.1016/j.neuroimage.2009.10.003](https://doi.org/10.1016/j.neuroimage.2009.10.003).
- 546 **Schafer CB**, Morgan BR, Ye AX, Taylor MJ, Doesburg SM. Oscillations, networks, and their development: MEG connectivity changes with age.  
547 *Hum Brain Mapp*. 2014; 35(10):5249–61. doi: [10.1002/hbm.22547](https://doi.org/10.1002/hbm.22547).
- 548 **Schoffelen JM**, Gross J. Source connectivity analysis with MEG and EEG. *Hum Brain Mapp*. 2009; 30(6):1857–65. doi: [10.1002/hbm.20745](https://doi.org/10.1002/hbm.20745).
- 549 **Smit DJ**, de Geus EJ, Boersma M, Boomsma DI, Stam CJ. Life-Span Development of Brain Network Integration Assessed with Phase Lag Index  
550 Connectivity and Minimum Spanning Tree Graphs. *Brain Connect*. 2016; 6(4):312–25. doi: [10.1089/brain.2015.0359](https://doi.org/10.1089/brain.2015.0359).
- 551 **Smith K**, Politte D, Reiker G, Nolan TS, Hildebolt C, Mattson C, Tucker D, Prior F, Turovets S, Larson-Prior LJ. Automated measurement of  
552 pediatric cranial bone thickness and density from clinical computed tomography. *Conf Proc IEEE Eng Med Biol Soc*. 2012; 2012:4462–5. doi:  
553 [10.1109/EMBC.2012.6346957](https://doi.org/10.1109/EMBC.2012.6346957).
- 554 **Sporns O**. Structure and function of complex brain networks. *Dialogues Clin Neurosci*. 2013; 15(3):247–62.
- 555 **Srinivasan R**. Spatial structure of the human alpha rhythm: global correlation in adults and local correlation in children. *Clin Neurophysiol*.  
556 1999; 110(8):1351–62.
- 557 **Stam CJ**. Modern network science of neurological disorders. *Nat Rev Neurosci*. 2014; 15(10):683–95. doi: [10.1038/nrn3801](https://doi.org/10.1038/nrn3801).
- 558 **Stam CJ**, de Haan W, Daffertshofer A, Jones BF, Manshanden I, van Cappellen van Walsum AM, Montez T, Verbunt JP, de Munck JC, van Dijk BW,  
559 Berendse HW, Scheltens P. Graph theoretical analysis of magnetoencephalographic functional connectivity in Alzheimer's disease. *Brain*.  
560 2009; 132(Pt 1):213–24. doi: [10.1093/brain/awn262](https://doi.org/10.1093/brain/awn262).
- 561 **Stam CJ**, Nolte G, Daffertshofer A. Phase lag index: assessment of functional connectivity from multi channel EEG and MEG with diminished  
562 bias from common sources. *Hum Brain Mapp*. 2007; 28(11):1178–93. doi: [10.1002/hbm.20346](https://doi.org/10.1002/hbm.20346).
- 563 **Stam CJ**, van Straaten ECW. The organization of physiological brain networks. *Clinical Neurophysiology*. 2012; 123(6):1067–1087. doi:  
564 [10.1016/j.clinph.2012.01.011](https://doi.org/10.1016/j.clinph.2012.01.011).
- 565 **Supekar K**, Musen M, Menon V. Development of large-scale functional brain networks in children. *PLoS Biol*. 2009; 7(7):e1000157. doi:  
566 [10.1371/journal.pbio.1000157](https://doi.org/10.1371/journal.pbio.1000157).

- 567 **Tewarie P**, van Dellen E, Hillebrand A, Stam CJ. The minimum spanning tree: an unbiased method for brain network analysis. *Neuroimage*.  
568 2015; 104:177–88. doi: [10.1016/j.neuroimage.2014.10.015](https://doi.org/10.1016/j.neuroimage.2014.10.015).
- 569 **Tewarie P**, Hillebrand A, van Dijk BW, Stam CJ, O'Neill GC, Van Mieghem P, Meier JM, Woolrich MW, Morris PG, Brookes MJ. Integrating  
570 cross-frequency and within band functional networks in resting-state MEG: A multi-layer network approach. *Neuroimage*. 2016; 142:324–336.  
571 doi: [10.1016/j.neuroimage.2016.07.057](https://doi.org/10.1016/j.neuroimage.2016.07.057).
- 572 **Tewarie P**, Hillebrand A, Schoonheim MM, van Dijk BW, Geurts JJG, Barkhof F, Polman CH, Stam CJ. Functional brain network anal-  
573 ysis using minimum spanning trees in Multiple Sclerosis: An MEG source-space study. *NeuroImage*. 2014; 88:308–318. doi:  
574 <https://doi.org/10.1016/j.neuroimage.2013.10.022>.
- 575 **Toth B**, Urban G, Haden GP, Mark M, Torok M, Stam CJ, Winkler I. Large-scale network organization of EEG functional connectivity in newborn  
576 infants. *Hum Brain Mapp*. 2017; 38(8):4019–4033. doi: [10.1002/hbm.23645](https://doi.org/10.1002/hbm.23645).
- 577 **Troebling L**, Lopez JD, Lutti A, Bestmann S, Barnes G. Discrimination of cortical laminae using MEG. *Neuroimage*. 2014; 102 Pt 2:885–93. doi:  
578 [10.1016/j.neuroimage.2014.07.015](https://doi.org/10.1016/j.neuroimage.2014.07.015).
- 579 **Tzourio-Mazoyer N**, Landeau B, Papathanassiou D, Crivello F, Etard O, Delcroix N, Mazoyer B, Joliot M. Automated anatomical labeling of  
580 activations in SPM using a macroscopic anatomical parcellation of the MNI MRI single-subject brain. *Neuroimage*. 2002; 15(1):273–89. doi:  
581 [10.1006/nimg.2001.0978](https://doi.org/10.1006/nimg.2001.0978).
- 582 **Van Mieghem P**, Wang H, Ge X, Tang S, Kuipers FA. Influence of assortativity and degree-preserving rewiring on the spectra of networks.  
583 *European Physical Journal B*. 2010; 76(4):643–652. doi: [10.1140/epjb/e2010-00219-x](https://doi.org/10.1140/epjb/e2010-00219-x).
- 584 **Wang H**, Hernandez JM, Van Mieghem P. Betweenness centrality in a weighted network. *Phys Rev E Stat Nonlin Soft Matter Phys*. 2008; 77(4 Pt  
585 2):046105. doi: [10.1103/PhysRevE.77.046105](https://doi.org/10.1103/PhysRevE.77.046105).
- 586 **Wang SH**, Lobier M, Siebenhuhner F, Puolivali T, Palva S, Palva JM. Hyperedge bundling: A practical solution to spurious interactions in MEG/EEG  
587 source connectivity analyses. *Neuroimage*. 2018; 173:610–622. doi: [10.1016/j.neuroimage.2018.01.056](https://doi.org/10.1016/j.neuroimage.2018.01.056).
- 588 **Weiskopf N**, Lutti A, Helms G, Novak M, Ashburner J, Hutton C. Unified segmentation based correction of R1 brain maps for RF transmit field  
589 inhomogeneities (UNICORT). *Neuroimage*. 2011; 54(3):2116–24. doi: [10.1016/j.neuroimage.2010.10.023](https://doi.org/10.1016/j.neuroimage.2010.10.023).
- 590 **Wig GS**. Segregated Systems of Human Brain Networks. *Trends Cogn Sci*. 2017; 21(12):981–996. doi: [10.1016/j.tics.2017.09.006](https://doi.org/10.1016/j.tics.2017.09.006).
- 591 **van Wijk BC**, Stam CJ, Daffertshofer A. Comparing brain networks of different size and connectivity density using graph theory. *PLoS One*.  
592 2010; 5(10):e13701. doi: [10.1371/journal.pone.0013701](https://doi.org/10.1371/journal.pone.0013701).
- 593 **Wolff JJ**, Piven J. Neurodevelopmental disorders: Accelerating progress in autism through developmental research. *Nat Rev Neurol*. 2014;  
594 10(8):431–2. doi: [10.1038/nrneurol.2014.126](https://doi.org/10.1038/nrneurol.2014.126).
- 595 **Yu M**, Engels MMA, Hillebrand A, van Straaten ECW, Gouw AA, Teunissen C, van der Flier WM, Scheltens P, Stam CJ. Selective impairment of  
596 hippocampus and posterior hub areas in Alzheimer's disease: an MEG-based multiplex network study. *Brain*. 2017; 140(5):1466–1485. doi:  
597 [10.1093/brain/awx050](https://doi.org/10.1093/brain/awx050).
- 598 **Yu M**, Gouw AA, Hillebrand A, Tijms BM, Stam CJ, van Straaten EC, Pijnenburg YA. Different functional connectivity and network topol-  
599 ogy in behavioral variant of frontotemporal dementia and Alzheimer's disease: an EEG study. *Neurobiol Aging*. 2016; 42:150–62. doi:  
600 [10.1016/j.neurobiolaging.2016.03.018](https://doi.org/10.1016/j.neurobiolaging.2016.03.018).

601 **Appendix 1**

602 **Appendix 1 Table 1.** Regions of interest (ROIs) that manifest significant Eccentricity differences between groups in the delta band.

| ROIs                                                  | Pairwise Permutation Comparisons (FDR-corrected) |                                     |                                    |                                 |
|-------------------------------------------------------|--------------------------------------------------|-------------------------------------|------------------------------------|---------------------------------|
|                                                       | Children (N = 24) vs Adults (N = 24)             | 5 Y.O. (N = 10) vs 10 Y.O. (N = 14) | 5 Y.O. (N = 10) vs Adults (N = 24) | 10 Y.O. (N=14) vs Adults (N=24) |
| <b>Left Hemisphere</b>                                |                                                  |                                     |                                    |                                 |
| Gryus Rectus                                          |                                                  |                                     | ↑                                  |                                 |
| Olfactory Cortex                                      |                                                  |                                     | ↑                                  |                                 |
| Superior frontal gyrus, orbital part                  | ↑                                                |                                     | ↑                                  |                                 |
| Frontal gyrus, medial orbital part                    |                                                  |                                     |                                    |                                 |
| Middle frontal gyrus, orbital part                    | ↑                                                |                                     | ↑                                  |                                 |
| Inferior frontal gyrus, orbital part                  | ↑                                                |                                     | ↑                                  |                                 |
| Superior frontal gyrus                                |                                                  |                                     | ↑                                  |                                 |
| Middle frontal gyrus                                  |                                                  |                                     | ↑                                  |                                 |
| Inferior frontal gyrus, opercular part                |                                                  |                                     | ↑                                  |                                 |
| Inferior frontal gyrus, triangular part               | ↑                                                |                                     | ↑                                  |                                 |
| Superior frontal gyrus, medial                        |                                                  |                                     | ↑                                  |                                 |
| Supplementary motor area                              |                                                  |                                     | ↑                                  |                                 |
| Paracentral lobule                                    |                                                  |                                     |                                    |                                 |
| Precentral gyrus                                      |                                                  | ↑                                   | ↑                                  |                                 |
| Rolandic operculum                                    |                                                  |                                     | ↑                                  |                                 |
| Postcentral gyrus                                     |                                                  |                                     |                                    |                                 |
| Superior parietal gyrus                               |                                                  | ↑                                   | ↑                                  |                                 |
| Inferior parietal, but supramarginal and angular gyri |                                                  |                                     | ↑                                  |                                 |
| Supramarginal gyrus                                   |                                                  |                                     |                                    |                                 |
| Angular gyrus                                         |                                                  |                                     | ↑                                  |                                 |
| Precuneus                                             | ↑                                                |                                     | ↑                                  |                                 |
| Superior occipital gyrus                              |                                                  | ↑                                   |                                    |                                 |
| Middle occipital gyrus                                |                                                  |                                     | ↑                                  |                                 |
| Inferior occipital gyrus                              |                                                  | ↑                                   | ↑                                  |                                 |
| Calcarine fissure and surrounding cortex              |                                                  |                                     |                                    |                                 |
| Cuneus                                                |                                                  | ↑                                   |                                    |                                 |
| Lingual gyrus                                         |                                                  |                                     |                                    |                                 |
| Fusiform gyrus                                        | ↑                                                |                                     | ↑                                  |                                 |
| Heschl gyrus                                          |                                                  | ↑                                   | ↑                                  |                                 |
| Superior temporal gyrus                               |                                                  |                                     |                                    |                                 |
| Middle temporal gyrus                                 |                                                  |                                     |                                    |                                 |



|                                                       |   |   |   |
|-------------------------------------------------------|---|---|---|
| Inferior temporal gyrus                               |   |   |   |
| Temporal pole: superior temporal gyrus                |   |   | ↑ |
| Temporal pole: middle temporal gyrus                  | ↑ | ↑ | ↑ |
| Parahippocampal gyrus                                 |   |   |   |
| Anterior cingulate and paracingulate gyri             |   |   |   |
| Median cingulate and paracingulate gyri               |   | ↑ | ↑ |
| Posterior cingulate gyrus                             | ↑ |   | ↑ |
| Insula                                                |   |   | ↑ |
| Hippocampus                                           |   |   |   |
| <hr/>                                                 |   |   |   |
| Right Hemisphere                                      |   |   |   |
| Gyrus Rectus                                          |   | ↑ | ↑ |
| Olfactory Cortex                                      |   | ↑ | ↑ |
| Superior frontal gyrus, orbital part                  |   |   |   |
| Frontal gyrus, medial orbital part                    |   |   | ↑ |
| Middle frontal gyrus, orbital part                    |   |   | ↑ |
| Inferior frontal gyrus, orbital part                  |   | ↑ | ↑ |
| Superior frontal gyrus                                | ↑ |   | ↑ |
| Middle frontal gyrus                                  | ↑ | ↑ | ↑ |
| Inferior frontal gyrus, opercular part                |   |   |   |
| Inferior frontal gyrus, triangular part               |   |   | ↑ |
| Superior frontal gyrus, medial                        |   |   | ↑ |
| Supplementary motor area                              | ↑ |   | ↑ |
| Paracentral lobule                                    |   |   |   |
| Precentral gyrus                                      |   |   | ↑ |
| Rolandic operculum                                    |   |   | ↑ |
| Postcentral gyrus                                     |   |   |   |
| Superior parietal gyrus                               | ↑ |   | ↑ |
| Inferior parietal, but supramarginal and angular gyri |   |   | ↑ |
| Supramarginal gyrus                                   |   |   |   |
| Angular gyrus                                         |   | ↑ |   |
| Precuneus                                             |   | ↑ | ↑ |
| Superior occipital gyrus                              |   | ↑ | ↑ |
| Middle occipital gyrus                                |   |   |   |
| Inferior occipital gyrus                              |   | ↑ | ↑ |
| Calcarine fissure and surrounding cortex              |   |   | ↑ |
| Cuneus                                                |   |   |   |
| Lingual gyrus                                         |   |   | ↑ |
| Fusiform gyrus                                        |   |   | ↑ |

|                                           |   |   |
|-------------------------------------------|---|---|
| Heschl gyrus                              | ↑ | ↑ |
| Superior temporal gyrus                   |   |   |
| Middle temporal gyrus                     |   |   |
| Inferior temporal gyrus                   | ↑ | ↑ |
| Temporal pole: superior temporal gyrus    |   | ↑ |
| Temporal pole: middle temporal gyrus      |   |   |
| Parahippocampal gyrus                     | ↑ | ↑ |
| Anterior cingulate and paracingulate gyri | ↑ |   |
| Median cingulate and paracingulate gyri   | ↑ | ↑ |
| Posterior cingulate gyrus                 | ↑ | ↑ |
| Insula                                    | ↑ |   |
| Hippocampus                               |   |   |

---

604

605

**Appendix 1 Table 2.** Regions of interest (ROIs) that manifest significant Eccentricity differences between groups in the theta band.

| ROIs                                                  | Pairwise Permutation Comparisons (FDR-corrected) |                                     |                                    |                                 |
|-------------------------------------------------------|--------------------------------------------------|-------------------------------------|------------------------------------|---------------------------------|
|                                                       | Children (N = 24) vs Adults (N = 24)             | 5 Y.O. (N = 10) vs 10 Y.O. (N = 14) | 5 Y.O. (N = 10) vs Adults (N = 24) | 10 Y.O. (N=14) vs Adults (N=24) |
| <b>Left Hemisphere</b>                                |                                                  |                                     |                                    |                                 |
| Gryus Rectus                                          | ↑                                                | ↑                                   | ↑                                  |                                 |
| Olfactory Cortex                                      | ↑                                                |                                     | ↑                                  |                                 |
| Superior frontal gyrus, orbital part                  | ↑                                                | ↑                                   | ↑                                  |                                 |
| Frontal gyrus, medial orbital part                    | ↑                                                | ↑                                   | ↑                                  |                                 |
| Middle frontal gyrus, orbital part                    | ↑                                                | ↑                                   | ↑                                  |                                 |
| Inferior frontal gyrus, orbital part                  | ↑                                                | ↑                                   | ↑                                  |                                 |
| Superior frontal gyrus                                | ↑                                                | ↑                                   | ↑                                  |                                 |
| Middle frontal gyrus                                  | ↑                                                |                                     | ↑                                  |                                 |
| Inferior frontal gyrus, opercular part                |                                                  | ↑                                   | ↑                                  |                                 |
| Inferior frontal gyrus, triangular part               | ↑                                                | ↑                                   | ↑                                  |                                 |
| Superior frontal gyrus, medial                        | ↑                                                |                                     | ↑                                  |                                 |
| Supplementary motor area                              | ↑                                                | ↑                                   | ↑                                  |                                 |
| Paracentral lobule                                    | ↑                                                | ↑                                   | ↑                                  |                                 |
| Precentral gyrus                                      | ↑                                                | ↑                                   | ↑                                  |                                 |
| Rolandic operculum                                    | ↑                                                | ↑                                   | ↑                                  |                                 |
| Postcentral gyrus                                     | ↑                                                | ↑                                   | ↑                                  |                                 |
| Superior parietal gyrus                               | ↑                                                | ↑                                   | ↑                                  |                                 |
| Inferior parietal, but supramarginal and angular gyri |                                                  |                                     |                                    |                                 |
| Supramarginal gyrus                                   | ↑                                                | ↑                                   | ↑                                  |                                 |
| Angular gyrus                                         | ↑                                                |                                     | ↑                                  |                                 |
| Precuneus                                             | ↑                                                |                                     | ↑                                  |                                 |
| Superior occipital gyrus                              | ↑                                                | ↑                                   | ↑                                  |                                 |
| Middle occipital gyrus                                | ↑                                                | ↑                                   | ↑                                  | ↑                               |
| Inferior occipital gyrus                              |                                                  | ↑                                   | ↑                                  |                                 |
| Calcarine fissure and surrounding cortex              | ↑                                                |                                     | ↑                                  | ↑                               |
| Cuneus                                                | ↑                                                |                                     | ↑                                  |                                 |
| Lingual gyrus                                         |                                                  | ↑                                   | ↑                                  |                                 |
| Fusiform gyrus                                        | ↑                                                | ↑                                   | ↑                                  | ↑                               |
| Heschl gyrus                                          | ↑                                                | ↑                                   | ↑                                  |                                 |
| Superior temporal gyrus                               | ↑                                                |                                     | ↑                                  |                                 |
| Middle temporal gyrus                                 | ↑                                                |                                     | ↑                                  | ↑                               |

|                                                       |   |   |   |   |
|-------------------------------------------------------|---|---|---|---|
| Inferior temporal gyrus                               | ↑ |   | ↑ |   |
| Temporal pole: superior temporal gyrus                | ↑ | ↑ | ↑ |   |
| Temporal pole: middle temporal gyrus                  |   | ↑ | ↑ |   |
| Parahippocampal gyrus                                 | ↑ | ↑ | ↑ |   |
| Anterior cingulate and paracingulate gyri             | ↑ | ↑ | ↑ |   |
| Median cingulate and paracingulate gyri               |   |   | ↑ |   |
| Posterior cingulate gyrus                             | ↑ |   | ↑ | ↑ |
| Insula                                                |   | ↑ | ↑ |   |
| Hippocampus                                           | ↑ | ↑ | ↑ |   |
| <hr/>                                                 |   |   |   |   |
| Right Hemisphere                                      |   |   |   |   |
| Gyrus Rectus                                          |   | ↑ | ↑ |   |
| Olfactory Cortex                                      |   | ↑ | ↑ |   |
| Superior frontal gyrus, orbital part                  | ↑ | ↑ | ↑ |   |
| Frontal gyrus, medial orbital part                    | ↑ |   | ↑ |   |
| Middle frontal gyrus, orbital part                    | ↑ | ↑ | ↑ |   |
| Inferior frontal gyrus, orbital part                  | ↑ | ↑ | ↑ |   |
| Superior frontal gyrus                                |   |   | ↑ |   |
| Middle frontal gyrus                                  | ↑ |   | ↑ |   |
| Inferior frontal gyrus, opercular part                | ↑ | ↑ | ↑ |   |
| Inferior frontal gyrus, triangular part               | ↑ | ↑ | ↑ |   |
| Superior frontal gyrus, medial                        | ↑ | ↑ | ↑ | ↑ |
| Supplementary motor area                              | ↑ | ↑ | ↑ | ↑ |
| Paracentral lobule                                    | ↑ | ↑ | ↑ | ↑ |
| Precentral gyrus                                      | ↑ | ↑ | ↑ |   |
| Rolandic operculum                                    | ↑ |   | ↑ |   |
| Postcentral gyrus                                     | ↑ | ↑ | ↑ |   |
| Superior parietal gyrus                               | ↑ |   | ↑ |   |
| Inferior parietal, but supramarginal and angular gyri | ↑ | ↑ | ↑ |   |
| Supramarginal gyrus                                   | ↑ | ↑ | ↑ |   |
| Angular gyrus                                         | ↑ | ↑ | ↑ |   |
| Precuneus                                             | ↑ |   | ↑ |   |
| Superior occipital gyrus                              | ↑ |   | ↑ |   |
| Middle occipital gyrus                                | ↑ |   | ↑ |   |
| Inferior occipital gyrus                              | ↑ |   | ↑ | ↑ |
| Calcarine fissure and surrounding cortex              | ↑ |   | ↑ |   |
| Cuneus                                                | ↑ |   | ↑ |   |
| Lingual gyrus                                         | ↑ | ↑ | ↑ |   |
| Fusiform gyrus                                        | ↑ |   | ↑ |   |

|                                           |   |   |   |   |
|-------------------------------------------|---|---|---|---|
| Heschl gyrus                              | ↑ | ↑ | ↑ |   |
| Superior temporal gyrus                   |   | ↑ | ↑ |   |
| Middle temporal gyrus                     | ↑ |   | ↑ |   |
| Inferior temporal gyrus                   | ↑ | ↑ | ↑ |   |
| Temporal pole: superior temporal gyrus    | ↑ | ↑ | ↑ |   |
| Temporal pole: middle temporal gyrus      | ↑ | ↑ | ↑ |   |
| Parahippocampal gyrus                     | ↑ |   | ↑ |   |
| Anterior cingulate and paracingulate gyri | ↑ | ↑ | ↑ |   |
| Median cingulate and paracingulate gyri   | ↑ | ↑ | ↑ |   |
| Posterior cingulate gyrus                 | ↑ | ↑ | ↑ |   |
| Insula                                    | ↑ |   | ↑ | ↑ |
| Hippocampus                               | ↑ | ↑ | ↑ |   |

---

607

608

**Appendix 1 Table 3.** Regions of interest (ROIs) that manifest significant Eccentricity differences between groups in the alpha band.

| ROIs                                                  | Pairwise Permutation Comparisons (FDR-corrected) |                                     |                                    |                                 |
|-------------------------------------------------------|--------------------------------------------------|-------------------------------------|------------------------------------|---------------------------------|
|                                                       | Children (N = 24) vs Adults (N = 24)             | 5 Y.O. (N = 10) vs 10 Y.O. (N = 14) | 5 Y.O. (N = 10) vs Adults (N = 24) | 10 Y.O. (N=14) vs Adults (N=24) |
| <b>Left Hemisphere</b>                                |                                                  |                                     |                                    |                                 |
| Gryus Rectus                                          |                                                  |                                     | ↑                                  |                                 |
| Olfactory Cortex                                      |                                                  |                                     | ↑                                  |                                 |
| Superior frontal gyrus, orbital part                  |                                                  |                                     |                                    |                                 |
| Frontal gyrus, medial orbital part                    | ↑                                                |                                     | ↑                                  |                                 |
| Middle frontal gyrus, orbital part                    |                                                  | ↑                                   | ↑                                  |                                 |
| Inferior frontal gyrus, orbital part                  | ↑                                                | ↑                                   | ↑                                  |                                 |
| Superior frontal gyrus                                |                                                  |                                     | ↑                                  |                                 |
| Middle frontal gyrus                                  | ↑                                                |                                     | ↑                                  |                                 |
| Inferior frontal gyrus, opercular part                | ↑                                                |                                     | ↑                                  |                                 |
| Inferior frontal gyrus, triangular part               | ↑                                                | ↑                                   | ↑                                  |                                 |
| Superior frontal gyrus, medial                        | ↑                                                |                                     | ↑                                  |                                 |
| Supplementary motor area                              | ↑                                                |                                     | ↑                                  |                                 |
| Paracentral lobule                                    | ↑                                                | ↑                                   | ↑                                  |                                 |
| Precentral gyrus                                      | ↑                                                |                                     | ↑                                  |                                 |
| Rolandic operculum                                    | ↑                                                | ↑                                   | ↑                                  |                                 |
| Postcentral gyrus                                     | ↑                                                |                                     | ↑                                  |                                 |
| Superior parietal gyrus                               | ↑                                                |                                     | ↑                                  |                                 |
| Inferior parietal, but supramarginal and angular gyri | ↑                                                |                                     | ↑                                  |                                 |
| Supramarginal gyrus                                   |                                                  | ↑                                   | ↑                                  |                                 |
| Angular gyrus                                         | ↑                                                |                                     | ↑                                  |                                 |
| Precuneus                                             | ↑                                                |                                     | ↑                                  |                                 |
| Superior occipital gyrus                              | ↑                                                | ↑                                   | ↑                                  |                                 |
| Middle occipital gyrus                                | ↑                                                | ↑                                   | ↑                                  |                                 |
| Inferior occipital gyrus                              | ↑                                                |                                     | ↑                                  |                                 |
| Calcarine fissure and surrounding cortex              | ↑                                                | ↑                                   | ↑                                  |                                 |
| Cuneus                                                | ↑                                                |                                     | ↑                                  |                                 |
| Lingual gyrus                                         | ↑                                                | ↑                                   | ↑                                  |                                 |
| Fusiform gyrus                                        | ↑                                                |                                     | ↑                                  | ↑                               |
| Heschl gyrus                                          | ↑                                                |                                     | ↑                                  |                                 |
| Superior temporal gyrus                               | ↑                                                |                                     | ↑                                  |                                 |
| Middle temporal gyrus                                 | ↑                                                | ↑                                   | ↑                                  |                                 |

|                                                       |   |   |   |   |
|-------------------------------------------------------|---|---|---|---|
| Inferior temporal gyrus                               | ↑ |   | ↑ | ↑ |
| Temporal pole: superior temporal gyrus                | ↑ | ↑ | ↑ |   |
| Temporal pole: middle temporal gyrus                  | ↑ |   | ↑ |   |
| Parahippocampal gyrus                                 | ↑ |   | ↑ |   |
| Anterior cingulate and paracingulate gyri             |   |   | ↑ |   |
| Median cingulate and paracingulate gyri               | ↑ |   | ↑ | ↑ |
| Posterior cingulate gyrus                             | ↑ |   | ↑ | ↑ |
| Insula                                                | ↑ |   | ↑ |   |
| Hippocampus                                           |   |   |   |   |
| <hr/>                                                 |   |   |   |   |
| Right Hemisphere                                      |   |   |   |   |
| Gyrus Rectus                                          | ↑ |   | ↑ |   |
| Olfactory Cortex                                      | ↑ |   | ↑ |   |
| Superior frontal gyrus, orbital part                  | ↑ | ↑ | ↑ |   |
| Frontal gyrus, medial orbital part                    |   |   | ↑ |   |
| Middle frontal gyrus, orbital part                    |   | ↑ | ↑ |   |
| Inferior frontal gyrus, orbital part                  |   | ↑ | ↑ |   |
| Superior frontal gyrus                                | ↑ |   | ↑ |   |
| Middle frontal gyrus                                  | ↑ | ↑ | ↑ |   |
| Inferior frontal gyrus, opercular part                | ↑ |   | ↑ |   |
| Inferior frontal gyrus, triangular part               | ↑ | ↑ | ↑ |   |
| Superior frontal gyrus, medial                        | ↑ | ↑ | ↑ |   |
| Supplementary motor area                              | ↑ |   | ↑ | ↑ |
| Paracentral lobule                                    | ↑ |   | ↑ | ↑ |
| Precentral gyrus                                      | ↑ |   | ↑ |   |
| Rolandic operculum                                    |   |   |   |   |
| Postcentral gyrus                                     | ↑ |   | ↑ |   |
| Superior parietal gyrus                               | ↑ | ↑ | ↑ |   |
| Inferior parietal, but supramarginal and angular gyri | ↑ |   | ↑ |   |
| Supramarginal gyrus                                   |   |   |   |   |
| Angular gyrus                                         |   |   | ↑ |   |
| Precuneus                                             | ↑ |   | ↑ | ↑ |
| Superior occipital gyrus                              |   |   | ↑ |   |
| Middle occipital gyrus                                |   |   | ↑ |   |
| Inferior occipital gyrus                              | ↑ |   | ↑ |   |
| Calcarine fissure and surrounding cortex              | ↑ |   | ↑ |   |
| Cuneus                                                |   | ↑ | ↑ |   |
| Lingual gyrus                                         | ↑ |   | ↑ |   |
| Fusiform gyrus                                        |   |   | ↑ |   |

|                                           |   |   |   |   |
|-------------------------------------------|---|---|---|---|
| Heschl gyrus                              | ↑ |   | ↑ |   |
| Superior temporal gyrus                   |   |   |   |   |
| Middle temporal gyrus                     |   |   |   |   |
| Inferior temporal gyrus                   |   |   | ↑ |   |
| Temporal pole: superior temporal gyrus    |   | ↑ | ↑ |   |
| Temporal pole: middle temporal gyrus      | ↑ | ↑ | ↑ |   |
| Parahippocampal gyrus                     | ↑ | ↑ | ↑ |   |
| Anterior cingulate and paracingulate gyri |   | ↑ | ↑ |   |
| Median cingulate and paracingulate gyri   | ↑ |   | ↑ | ↑ |
| Posterior cingulate gyrus                 | ↑ |   | ↑ | ↑ |
| Insula                                    | ↑ |   | ↑ |   |
| Hippocampus                               | ↑ |   | ↑ |   |

---



610

612

**Appendix 1 Table 4.** Regions of interest (ROIs) that manifest significant Eccentricity differences between groups in the beta band.

| ROIs                                                  | Pairwise Permutation Comparisons (FDR-corrected) |                                     |                                    |                                 |
|-------------------------------------------------------|--------------------------------------------------|-------------------------------------|------------------------------------|---------------------------------|
|                                                       | Children (N = 24) vs Adults (N = 24)             | 5 Y.O. (N = 10) vs 10 Y.O. (N = 14) | 5 Y.O. (N = 10) vs Adults (N = 24) | 10 Y.O. (N=14) vs Adults (N=24) |
| <b>Left Hemisphere</b>                                |                                                  |                                     |                                    |                                 |
| Gryus Rectus                                          |                                                  |                                     |                                    |                                 |
| Olfactory Cortex                                      | ↑                                                |                                     | ↑                                  |                                 |
| Superior frontal gyrus, orbital part                  | ↑                                                |                                     | ↑                                  |                                 |
| Frontal gyrus, medial orbital part                    |                                                  |                                     |                                    |                                 |
| Middle frontal gyrus, orbital part                    | ↑                                                |                                     | ↑                                  |                                 |
| Inferior frontal gyrus, orbital part                  | ↑                                                |                                     | ↑                                  |                                 |
| Superior frontal gyrus                                | ↑                                                |                                     | ↑                                  |                                 |
| Middle frontal gyrus                                  |                                                  |                                     |                                    |                                 |
| Inferior frontal gyrus, opercular part                | ↑                                                |                                     | ↑                                  |                                 |
| Inferior frontal gyrus, triangular part               | ↑                                                |                                     | ↑                                  |                                 |
| Superior frontal gyrus, medial                        | ↑                                                | ↑                                   | ↑                                  | ↑                               |
| Supplementary motor area                              | ↑                                                | ↑                                   | ↑                                  |                                 |
| Paracentral lobule                                    |                                                  |                                     |                                    |                                 |
| Precentral gyrus                                      | ↑                                                |                                     | ↑                                  |                                 |
| Rolandic operculum                                    |                                                  |                                     |                                    |                                 |
| Postcentral gyrus                                     |                                                  |                                     | ↑                                  |                                 |
| Superior parietal gyrus                               |                                                  |                                     |                                    |                                 |
| Inferior parietal, but supramarginal and angular gyri | ↑                                                |                                     | ↑                                  |                                 |
| Supramarginal gyrus                                   |                                                  |                                     | ↑                                  |                                 |
| Angular gyrus                                         |                                                  |                                     |                                    |                                 |
| Precuneus                                             |                                                  | ↑                                   | ↑                                  |                                 |
| Superior occipital gyrus                              | ↑                                                |                                     | ↑                                  |                                 |
| Middle occipital gyrus                                |                                                  |                                     |                                    |                                 |
| Inferior occipital gyrus                              |                                                  |                                     | ↑                                  |                                 |
| Calcarine fissure and surrounding cortex              |                                                  |                                     |                                    |                                 |
| Cuneus                                                | ↑                                                |                                     |                                    |                                 |
| Lingual gyrus                                         |                                                  |                                     |                                    |                                 |
| Fusiform gyrus                                        |                                                  | ↑                                   | ↑                                  |                                 |
| Heschl gyrus                                          |                                                  |                                     |                                    |                                 |
| Superior temporal gyrus                               |                                                  |                                     |                                    |                                 |
| Middle temporal gyrus                                 | ↑                                                |                                     | ↑                                  |                                 |

|                                                       |   |   |   |   |
|-------------------------------------------------------|---|---|---|---|
| Inferior temporal gyrus                               | ↑ |   | ↑ |   |
| Temporal pole: superior temporal gyrus                | ↑ |   | ↑ | ↑ |
| Temporal pole: middle temporal gyrus                  | ↑ |   | ↑ | ↑ |
| Parahippocampal gyrus                                 | ↑ | ↑ | ↑ |   |
| Anterior cingulate and paracingulate gyri             | ↑ |   | ↑ |   |
| Median cingulate and paracingulate gyri               |   |   |   |   |
| Posterior cingulate gyrus                             | ↑ | ↑ | ↑ |   |
| Insula                                                |   |   | ↑ |   |
| Hippocampus                                           |   |   | ↑ |   |
| <hr/>                                                 |   |   |   |   |
| Right Hemisphere                                      |   |   |   |   |
| Gyrus Rectus                                          | ↑ | ↑ | ↑ |   |
| Olfactory Cortex                                      |   |   |   |   |
| Superior frontal gyrus, orbital part                  | ↑ |   | ↑ |   |
| Frontal gyrus, medial orbital part                    | ↑ |   | ↑ |   |
| Middle frontal gyrus, orbital part                    | ↑ | ↑ | ↑ | ↑ |
| Inferior frontal gyrus, orbital part                  | ↑ |   | ↑ |   |
| Superior frontal gyrus                                |   |   |   |   |
| Middle frontal gyrus                                  | ↑ |   | ↑ |   |
| Inferior frontal gyrus, opercular part                | ↑ |   | ↑ |   |
| Inferior frontal gyrus, triangular part               | ↑ |   | ↑ |   |
| Superior frontal gyrus, medial                        | ↑ | ↑ | ↑ |   |
| Supplementary motor area                              | ↑ |   |   |   |
| Paracentral lobule                                    |   |   |   |   |
| Precentral gyrus                                      |   | ↑ | ↑ |   |
| Rolandic operculum                                    | ↑ |   | ↑ | ↑ |
| Postcentral gyrus                                     |   | ↑ | ↑ |   |
| Superior parietal gyrus                               |   |   |   |   |
| Inferior parietal, but supramarginal and angular gyri |   |   |   |   |
| Supramarginal gyrus                                   |   |   | ↑ |   |
| Angular gyrus                                         | ↑ |   | ↑ |   |
| Precuneus                                             | ↑ |   | ↑ |   |
| Superior occipital gyrus                              |   |   |   |   |
| Middle occipital gyrus                                | ↑ |   | ↑ |   |
| Inferior occipital gyrus                              |   |   |   |   |
| Calcarine fissure and surrounding cortex              | ↑ |   |   |   |
| Cuneus                                                |   |   |   |   |
| Lingual gyrus                                         |   |   |   |   |
| Fusiform gyrus                                        | ↑ |   | ↑ |   |

|                                           |   |   |   |   |
|-------------------------------------------|---|---|---|---|
| Heschl gyrus                              | ↑ |   | ↑ | ↑ |
| Superior temporal gyrus                   |   |   | ↑ |   |
| Middle temporal gyrus                     |   | ↑ | ↑ |   |
| Inferior temporal gyrus                   |   |   | ↑ |   |
| Temporal pole: superior temporal gyrus    | ↑ |   | ↑ |   |
| Temporal pole: middle temporal gyrus      | ↑ |   | ↑ |   |
| Parahippocampal gyrus                     | ↑ |   | ↑ |   |
| Anterior cingulate and paracingulate gyri | ↑ |   | ↑ |   |
| Median cingulate and paracingulate gyri   |   |   |   |   |
| Posterior cingulate gyrus                 | ↑ |   | ↑ |   |
| Insula                                    | ↑ | ↑ | ↑ |   |
| Hippocampus                               | ↑ |   | ↑ |   |

---

613  
614  
616

**Appendix 1 Table 5.** Regions of interest (ROIs) that manifest significant Eccentricity differences between groups in the low gamma band.

| ROIs                                                  | Pairwise Permutation Comparisons (FDR-corrected) |                                     |                                    |                                 |
|-------------------------------------------------------|--------------------------------------------------|-------------------------------------|------------------------------------|---------------------------------|
|                                                       | Children (N = 24) vs Adults (N = 24)             | 5 Y.O. (N = 10) vs 10 Y.O. (N = 14) | 5 Y.O. (N = 10) vs Adults (N = 24) | 10 Y.O. (N=14) vs Adults (N=24) |
| <b>Left Hemisphere</b>                                |                                                  |                                     |                                    |                                 |
| Gryus Rectus                                          |                                                  |                                     |                                    |                                 |
| Olfactory Cortex                                      |                                                  |                                     |                                    |                                 |
| Superior frontal gyrus, orbital part                  |                                                  |                                     | ↑                                  |                                 |
| Frontal gyrus, medial orbital part                    |                                                  |                                     |                                    |                                 |
| Middle frontal gyrus, orbital part                    |                                                  | ↑                                   | ↑                                  |                                 |
| Inferior frontal gyrus, orbital part                  | ↑                                                | ↑                                   | ↑                                  |                                 |
| Superior frontal gyrus                                |                                                  |                                     |                                    |                                 |
| Middle frontal gyrus                                  | ↑                                                |                                     | ↑                                  |                                 |
| Inferior frontal gyrus, opercular part                | ↑                                                |                                     | ↑                                  |                                 |
| Inferior frontal gyrus, triangular part               |                                                  |                                     |                                    |                                 |
| Superior frontal gyrus, medial                        |                                                  |                                     |                                    |                                 |
| Supplementary motor area                              |                                                  |                                     |                                    |                                 |
| Paracentral lobule                                    | ↑                                                |                                     |                                    |                                 |
| Precentral gyrus                                      | ↑                                                |                                     | ↑                                  |                                 |
| Rolandic operculum                                    |                                                  |                                     |                                    |                                 |
| Postcentral gyrus                                     |                                                  |                                     |                                    |                                 |
| Superior parietal gyrus                               |                                                  |                                     |                                    |                                 |
| Inferior parietal, but supramarginal and angular gyri |                                                  |                                     |                                    |                                 |
| Supramarginal gyrus                                   |                                                  | ↑                                   | ↑                                  |                                 |
| Angular gyrus                                         | ↑                                                |                                     | ↑                                  |                                 |
| Precuneus                                             | ↑                                                |                                     | ↑                                  |                                 |
| Superior occipital gyrus                              | ↑                                                |                                     | ↑                                  |                                 |
| Middle occipital gyrus                                | ↑                                                |                                     | ↑                                  | ↑                               |
| Inferior occipital gyrus                              | ↑                                                |                                     |                                    |                                 |
| Calcarine fissure and surrounding cortex              |                                                  |                                     | ↑                                  |                                 |
| Cuneus                                                | ↑                                                |                                     | ↑                                  | ↑                               |
| Lingual gyrus                                         |                                                  |                                     |                                    |                                 |
| Fusiform gyrus                                        |                                                  |                                     |                                    |                                 |
| Heschl gyrus                                          |                                                  |                                     | ↑                                  |                                 |
| Superior temporal gyrus                               | ↑                                                | ↑                                   | ↑                                  |                                 |
| Middle temporal gyrus                                 |                                                  |                                     |                                    |                                 |

|                                                       |   |   |   |
|-------------------------------------------------------|---|---|---|
| Inferior temporal gyrus                               |   |   |   |
| Temporal pole: superior temporal gyrus                | ↑ |   | ↑ |
| Temporal pole: middle temporal gyrus                  |   |   |   |
| Parahippocampal gyrus                                 |   |   |   |
| Anterior cingulate and paracingulate gyri             |   |   |   |
| Median cingulate and paracingulate gyri               | ↑ |   | ↑ |
| Posterior cingulate gyrus                             | ↑ |   | ↑ |
| Insula                                                | ↑ |   |   |
| Hippocampus                                           |   |   |   |
| <hr/>                                                 |   |   |   |
| Right Hemisphere                                      |   |   |   |
| Gyrus Rectus                                          |   | ↑ | ↑ |
| Olfactory Cortex                                      |   |   |   |
| Superior frontal gyrus, orbital part                  |   |   | ↑ |
| Frontal gyrus, medial orbital part                    | ↑ |   | ↑ |
| Middle frontal gyrus, orbital part                    | ↑ | ↑ | ↑ |
| Inferior frontal gyrus, orbital part                  | ↑ |   | ↑ |
| Superior frontal gyrus                                |   |   |   |
| Middle frontal gyrus                                  |   |   |   |
| Inferior frontal gyrus, opercular part                |   |   |   |
| Inferior frontal gyrus, triangular part               |   |   |   |
| Superior frontal gyrus, medial                        | ↑ | ↑ | ↑ |
| Supplementary motor area                              |   |   |   |
| Paracentral lobule                                    | ↑ |   | ↑ |
| Precentral gyrus                                      | ↑ |   | ↑ |
| Rolandic operculum                                    |   |   | ↑ |
| Postcentral gyrus                                     |   |   |   |
| Superior parietal gyrus                               |   |   |   |
| Inferior parietal, but supramarginal and angular gyri |   |   |   |
| Supramarginal gyrus                                   | ↑ |   | ↑ |
| Angular gyrus                                         |   |   | ↑ |
| Precuneus                                             |   |   |   |
| Superior occipital gyrus                              |   |   |   |
| Middle occipital gyrus                                | ↑ |   | ↑ |
| Inferior occipital gyrus                              |   |   |   |
| Calcarine fissure and surrounding cortex              | ↑ |   | ↑ |
| Cuneus                                                | ↑ |   | ↑ |
| Lingual gyrus                                         |   |   |   |
| Fusiform gyrus                                        |   |   | ↑ |

|                                           |   |   |   |   |
|-------------------------------------------|---|---|---|---|
| Heschl gyrus                              |   |   |   |   |
| Superior temporal gyrus                   |   |   |   |   |
| Middle temporal gyrus                     |   |   | ↑ |   |
| Inferior temporal gyrus                   |   |   | ↑ |   |
| Temporal pole: superior temporal gyrus    |   |   | ↑ |   |
| Temporal pole: middle temporal gyrus      | ↑ | ↑ | ↑ |   |
| Parahippocampal gyrus                     |   |   |   |   |
| Anterior cingulate and paracingulate gyri |   |   | ↑ |   |
| Median cingulate and paracingulate gyri   |   |   |   |   |
| Posterior cingulate gyrus                 | ↑ |   | ↑ | ↑ |
| Insula                                    |   |   | ↑ | ↑ |
| Hippocampus                               | ↑ |   | ↑ |   |

---
